# Supplementary material
Source: publisher figshare collection journal article supplement (https://acs.figshare.com/ndownloader/files/3601023)

Supplementary Information for

**Palladium Catalyzed Stille-Type Coupling of *N*-Acyl Iminium Ions with Distannanes: A Multicomponent Synthesis of  $\alpha$ -Amidostannanes**

Boran Xu and Bruce A. Arndtsen\*

Department of Chemistry, McGill University, 801 Sherbrooke St. W. Montreal, Quebec,  
Canada H3A 2K6

Table of Contents

|       |                                                                                         |         |
|-------|-----------------------------------------------------------------------------------------|---------|
| I.    | General Procedures                                                                      | S2      |
| II.   | Typical Synthesis and Characterization of $\alpha$ -Amidostannanes                      | S2-S7   |
| III.  | Synthesis of $\alpha$ -Amidostannane <b>1a</b> with [SnMe <sub>3</sub> ] <sub>2</sub>   | S7-S8   |
| IV.   | Synthesis of $\alpha$ -Amidostannane <b>1a</b> with Bu <sub>3</sub> SnSiMe <sub>3</sub> | S8      |
| V.    | Reaction of Complex <b>A</b> with (SnBu <sub>3</sub> ) <sub>2</sub>                     | S8-S9   |
| VI.   | Synthesis and Characterization of $\alpha$ -Amido Acids                                 | S9-S10  |
| VII.  | References                                                                              | S10     |
| VIII. | <sup>1</sup> H and <sup>13</sup> C NMR Spectra                                          | S10-S32 |

\*Email: [bruce.arndtsen@mcgill.ca](mailto:bruce.arndtsen@mcgill.ca)

## I. General Procedures

All manipulations were performed under inert atmosphere inside a nitrogen glovebox unless otherwise noted. All solvents were dried by passage through activated alumina and stored in a nitrogen glovebox. All common reagents were purchased from Aldrich and used as received.  $\text{Pd}_2\text{dba}_3\text{CHCl}_3$  was synthesized from a literature procedure.<sup>1</sup> Imines were synthesized by the condensation of the appropriate amine and aldehyde in presence of  $\text{MgSO}_4$  according a literature protocol.<sup>2</sup> Complex A was synthesized according to a literature procedure.<sup>3</sup> NMR characterization was performed at 300 MHz, 400 MHz and 500 MHz for  $^1\text{H}$  NMR and 75 MHz and 126 MHz for  $^{13}\text{C}$  NMR. Chemical shifts are reported in parts per million relative to the residual solvent signal. Mass spectra were recorded on a high-resolution electrospray ionization quadrupole spectrometer.

## II. Typical Synthesis of $\alpha$ -Amidostannanes

(4- $\text{CH}_3\text{C}_6\text{H}_4$ )HC=NCH<sub>2</sub>C<sub>6</sub>H<sub>5</sub> (41.9 mg, 0.2 mmol, 1 eq), benzoyl chloride (42.2 mg, 0.3 mmol, 1.5 eq) and  $\text{Pd}_2\text{dba}_3\text{CHCl}_3$  (3.1 mg, 0.003 mmol, 1.5 mol%) were combined in 2 mL of THF. The resulting mixture was stirred for 15 min until the disappearance of the initial purple color.  $(\text{SnBu}_3)_2$  (174.0 mg, 0.30 mmol, 1.5 eq) was added dropwise as a solution in 2 mL of THF. The resulting solution was stirred at room temperature for 16h inside the glovebox. The mixture was then directly charged on a column packed with 10% wt.  $\text{K}_2\text{CO}_3/\text{SiO}_2$ . The product was isolated by eluting with hexanes: ethyl acetate (gradient 100:1 to 20:1) as a clear oil (74%, 89.5 mg, 0.14 mmol)

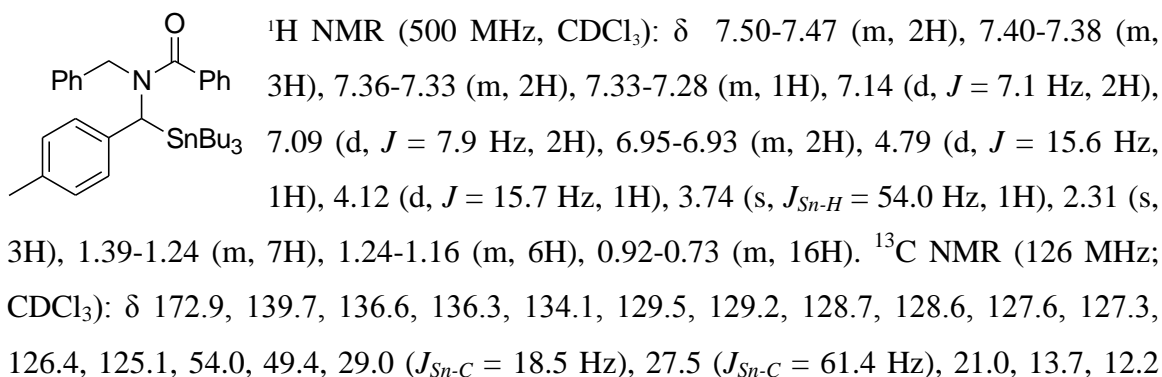

( $J_{Sn-C} = 343.9$  Hz) HRMS (ESI):  $C_{34}H_{47}NNaOSn$  ( $M+Na$ )<sup>+</sup> calc: 628.2579 observed: 628.2579

Yield 76% <sup>1</sup>H NMR (500 MHz, CDCl<sub>3</sub>): δ 7.47-7.44 (m, 2H), 7.42-7.40 (m, 3H), 7.08 (d,  $J = 7.8$  Hz, 2H), 6.98-6.96 (m, 2H), 5.75-5.71 (m, 1H), 5.23 (dd,  $J = 10.3, 1.3$  Hz, 1H), 5.15 (dd,  $J = 17.1, 1.5$  Hz, 1H), 4.05-4.01 (m, 1H), 3.92 (s,  $J_{Sn-H} = 53.0$  Hz, 1H), 3.63 (dd,  $J = 16.2, 6.8$  Hz, 1H), 2.32 (s, 3H), 1.47-1.35 (m, 6H), 1.25 (m, 7H), 0.93-0.79 (m, 16H). <sup>13</sup>C NMR (126 MHz, CDCl<sub>3</sub>): δ 172.8, 139.9, 136.3, 134.0, 133.3, 129.5, 129.1<sub>2</sub>, 129.0<sub>9</sub>, 128.5, 126.3, 125.0, 117.9, 53.5, 50.1 ( $J_{Sn-C} = 304.8$  Hz), 29.1 ( $J_{Sn-C} = 18.6$  Hz), 27.5 ( $J_{Sn-C} = 60.6$  Hz), 20.9, 13.8, 12.3 ( $J_{Sn-C} = 342.7$  Hz) HRMS (ESI):  $C_{30}H_{45}NNaOSn$  ( $M+Na$ )<sup>+</sup> calc: 578.2421 observed: 578.2429

Yield 67% <sup>1</sup>H NMR (500 MHz, CDCl<sub>3</sub>): δ 7.44-7.42 (m, 5H), 7.08 (d,  $J = 7.9$  Hz, 2H), 6.99 (d,  $J = 7.9$  Hz, 2H), 3.89 (s,  $J_{Sn-H} = 53.0$  Hz, 1H), 3.37 (m, 1H), 3.22 (m, 1H), 2.32 (s, 3H), 1.50-1.36 (m, 6H), 1.29 (m, 7H), 1.09 (t,  $J = 7.0$  Hz, 3H), 0.96-0.77 (m, 15H). <sup>13</sup>C NMR (126 MHz, CDCl<sub>3</sub>): δ 172.4, 140.5, 136.9, 133.8, 129.1<sub>8</sub>, 129.0<sub>8</sub>, 128.5, 126.1, 124.7, 50.4 ( $J_{Sn-C} = 306.7$  Hz), 46.1, 29.2 ( $J_{Sn-C} = 18.9$  Hz), 27.6 ( $J_{Sn-C} = 60.1$  Hz), 20.9, 14.1, 13.8, 12.4 ( $J_{Sn-C} = 351.8$  Hz). <sup>119</sup>Sn NMR (CDCl<sub>3</sub>, 186 MHz): δ -35.2 ppm. HRMS (ESI):  $C_{29}H_{45}NNaOSn$  ( $M+Na$ )<sup>+</sup> calc: 566.2421 observed: 566.2435

Yield 65% <sup>1</sup>H NMR (500 MHz, CDCl<sub>3</sub>): δ 7.46 (d,  $J = 5.0$  Hz, 1H), 7.40 (d,  $J = 3.6$  Hz, 1H), 7.06-7.03 (m, 3H), 6.93 (d,  $J = 7.9$  Hz, 2H), 5.86 (m, 1H), 5.28 (m, 2H), 4.42 (m, 1H), 3.94 (s,  $J_{Sn-H} = 52.5$  Hz, 1H), 3.81 (m, 1H), 2.30 (s, 3H), 1.44-1.29 (m, 7H), 1.29-1.18 (m, 7H), 0.94-0.70 (m, 16H). <sup>13</sup>C NMR (126 MHz, CDCl<sub>3</sub>): δ 165.8, 139.7, 137.3, 134.0, 133.4, 129.1, 128.7, 128.3, 126.8, 125.0, 117.7, 53.8 ( $J_{Sn-C} = 18.9$  Hz), 52.0 ( $J_{Sn-C} = 295.8$  Hz), 29.0 ( $J_{Sn-C} = 18.6$  Hz), 27.5 ( $J_{Sn-C} = 60.6$  Hz), 20.9, 13.7, 12.2 ( $J_{Sn-C} = 341.3$  Hz) HRMS (ESI):  $C_{28}H_{43}NNaOSSn$  ( $M+Na$ )<sup>+</sup> calc: 584.1983 observed: 584.1996

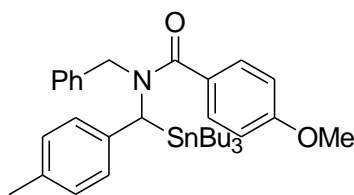

Yield 54%  $^1\text{H}$  NMR (500 MHz;  $\text{CDCl}_3$ ):  $\delta$  7.48-7.46 (m, 2H), 7.37-7.29 (m, 3H), 7.16 (d,  $J = 7.2$  Hz, 2H), 7.08 (d,  $J = 7.9$  Hz, 2H), 6.94-6.88 (m, 4H), 4.88 (d,  $J = 15.9$  Hz, 1H), 4.16 (d,  $J = 15.9$  Hz, 1H), 3.81 (s, 3H), 3.76 (s,  $J_{\text{Sn-H}} = 53.0$  Hz, 1H), 2.32 (s, 3H), 1.38-1.28 (m, 6H), 1.27-1.17 (m, 7H), 0.87-0.74 (m, 15H).  $^{13}\text{C}$  NMR (126 MHz;  $\text{CDCl}_3$ ):  $\delta$  172.8, 160.6, 139.9, 136.9, 134.0, 129.1, 128.7, 128.3<sub>9</sub>, 128.3<sub>4</sub>, 127.5, 127.1, 125.1, 113.9, 55.3, 54.1 ( $J_{\text{Sn-C}} = 19.3$  Hz), 50.0 ( $J_{\text{Sn-C}} = 309.1$  Hz), 29.0 ( $J_{\text{Sn-C}} = 18.4$  Hz), 27.5 ( $J_{\text{Sn-C}} = 61.2$  Hz), 20.9, 13.7, 12.3 ( $J_{\text{Sn-C}} = 343.4$  Hz) HRMS (ESI):  $\text{C}_{35}\text{H}_{49}\text{NNaO}_2\text{Sn}$  ( $\text{M}+\text{Na}$ ) $^+$  calc: 658.2685 observed: 658.2672

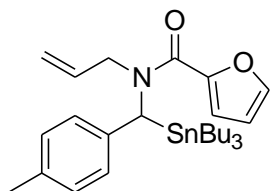

Yield 67%  $^1\text{H}$  NMR (500 MHz,  $\text{CDCl}_3$ ):  $\delta$  7.52 (m, 1H), 7.05-7.01 (m, 3H), 6.93-6.92 (m, 2H), 6.49 (m, 1H), 5.92 (m,  $J = 3.4$  Hz, 1H), 5.29-5.21 (m, 2H), 4.56-4.52 (m, 1H), 3.91 (s,  $J_{\text{Sn-H}} = 53.0$  Hz, 1H), 3.73 (m,  $J = 1.2$  Hz, 1H), 2.29 (s, 3H), 1.41-1.28 (m, 7H), 1.22 (m, 7H), 0.94-0.71 (m, 16H).  $^{13}\text{C}$  NMR (126 MHz,  $\text{CDCl}_3$ ):  $\delta$  161.5, 147.3, 144.1, 139.7, 134.0, 133.7, 129.0, 125.1, 117.6, 115.5, 111.1, 52.8, 52.0, 29.0 ( $J_{\text{Sn-C}} = 18.8$  Hz), 27.4 ( $J_{\text{Sn-C}} = 58.0$  Hz), 20.9, 13.7, 12.1 ( $J_{\text{Sn-C}} = 366.7$  Hz) HRMS (ESI):  $\text{C}_{28}\text{H}_{43}\text{NNaO}_2\text{Sn}$  ( $\text{M}+\text{Na}$ ) $^+$  calc: 568.2213 observed: 568.2209

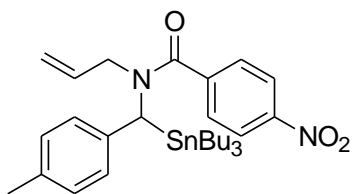

Yield 64%  $^1\text{H}$  NMR (500 MHz,  $\text{CDCl}_3$ ):  $\delta$  8.29 (d,  $J = 8.7$  Hz, 2H), 7.63 (d,  $J = 8.7$  Hz, 2H), 7.09 (d,  $J = 7.8$  Hz, 2H), 6.95 (d,  $J = 8.0$  Hz, 2H), 5.70 (m, 1H), 5.28-5.14 (m, 2H), 3.92-3.85 (m, 2H), 3.66 (m, 1H), 2.32 (s, 3H), 1.45-1.34 (m, 7H), 1.31-1.21 (m, 8H), 0.94-0.79 (m, 17H).  $^{13}\text{C}$  NMR (126 MHz,  $\text{CDCl}_3$ ):  $\delta$  170.6, 148.3, 142.5, 139.4, 134.4, 132.5, 129.3, 127.4, 125.0, 123.9, 118.4, 53.4, 50.5, 29.0 ( $J_{\text{Sn-C}} = 18.3$  Hz), 27.5 ( $J_{\text{Sn-C}} = 61.7$  Hz), 20.9, 13.7, 12.2 ( $J_{\text{Sn-C}} = 344.2$  Hz) HRMS (ESI):  $\text{C}_{30}\text{H}_{44}\text{N}_2\text{NaO}_3\text{Sn}$  ( $\text{M}+\text{Na}$ ) $^+$  calc: 623.2272 observed: 623.2246

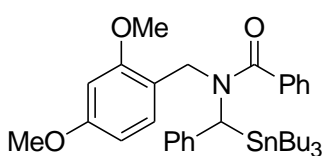

Yield 47%  $^1\text{H}$  NMR (500 MHz,  $\text{CDCl}_3$ ):  $\delta$  7.52-7.50 (m, 2H), 7.41-7.39 (m, 3H), 7.27-7.24 (m, 3H), 7.09-7.06 (m, 1H), 7.04-7.00 (m, 3H), 6.45 (dd,  $J = 8.3, 2.4$  Hz, 1H), 6.37 (d,  $J = 2.4$

Hz, 1H), 4.66 (d,  $J = 15.2$  Hz, 1H), 4.18 (d,  $J = 15.2$  Hz, 1H), 3.82 (d,  $J = 21.6$  Hz, 4H), 3.65 (s, 3H), 1.36-1.25 (m, 7H), 1.20 (m, 7H), 0.84-0.71 (m, 16H).  $^{13}\text{C}$  NMR (126 MHz;  $\text{CDCl}_3$ ):  $\delta$  172.8, 160.6, 158.5, 143.4, 136.7, 129.8, 129.3, 128.30, 128.29, 126.7, 124.9, 124.3, 116.9, 103.7, 98.4, 55.3, 54.8, 49.8, 49.5, 28.9 ( $J_{\text{Sn-C}} = 18.3$  Hz) 27.5 ( $J_{\text{Sn-C}} = 61.4$  Hz), 13.7, 12.1 ( $J_{\text{Sn-C}} = 343.0$  Hz) HRMS (ESI):  $\text{C}_{35}\text{H}_{49}\text{NNaO}_3\text{Sn}$  ( $\text{M}+\text{Na}$ ) $^+$  calc: 674.2634 observed: 674.2603

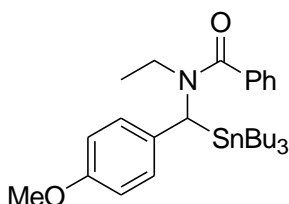 Yield 60%  $^1\text{H}$  NMR (500 MHz,  $\text{CDCl}_3$ ):  $\delta$  7.43-7.40 (m, 5H), 7.05-7.02 (m, 2H), 6.85-6.82 (m, 2H), 3.84 (s,  $J_{\text{Sn-H}} = 53.0$  Hz, 1H), 3.79 (s, 3H), 3.37 (dd,  $J = 14.3, 7.1$  Hz, 1H), 3.22 (dd,  $J = 14.3, 7.1$  Hz, 1H), 1.48-1.38 (m, 7H), 1.27 (m, 7H), 1.08 (t,  $J = 7.1$  Hz, 3H), 0.92-0.79 (m, 16H).  $^{13}\text{C}$  NMR (126 MHz,  $\text{CDCl}_3$ ):  $\delta$  172.4, 156.9, 136.9, 135.9, 129.2, 128.5, 126.09, 125.92, 113.9, 55.3, 49.9 ( $J_{\text{Sn-C}} = 314.6$  Hz), 46.0 ( $J_{\text{Sn-C}} = 18.4$  Hz), 29.1 ( $J_{\text{Sn-C}} = 18.9$  Hz), 27.5 ( $J_{\text{Sn-C}} = 58.8$  Hz), 14.1, 12.3 ( $J_{\text{Sn-C}} = 341.2$  Hz) HRMS (ESI):  $\text{C}_{29}\text{H}_{45}\text{NNaO}_2\text{Sn}$  ( $\text{M}+\text{Na}$ ) $^+$  calc: 582.2370 observed: 582.2342

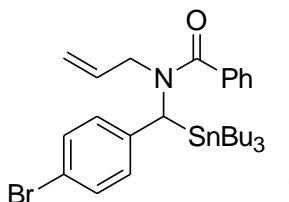 Yield 46%  $^1\text{H}$  NMR (500 MHz,  $\text{CDCl}_3$ ):  $\delta$  7.46-7.37 (m, 7H), 6.95-6.93 (m, 2H), 5.79-5.66 (m, 1H), 5.23 (d,  $J = 10.3$  Hz, 1H), 5.14 (d,  $J = 17.2$  Hz, 1H), 4.05-4.01 (m, 1H), 3.89 (s,  $J_{\text{Sn-H}} = 52.0$  Hz, 1H), 3.63 (dd,  $J = 16.2, 6.8$  Hz, 1H), 1.46-1.33 (m, 6H), 1.29-1.21 (m, 6H), 0.94-0.78 (m, 15H).  $^{13}\text{C}$  NMR (126 MHz,  $\text{CDCl}_3$ ):  $\delta$  172.8, 142.5, 135.9, 133.1, 131.4, 129.7, 128.6, 126.6, 126.4, 118.2, 117.8, 53.8, 50.3, 29.0 ( $J_{\text{Sn-C}} = 18.8$  Hz), 27.5 ( $J_{\text{Sn-C}} = 60.2$  Hz), 13.7, 12.4 ( $J_{\text{Sn-C}} = 344.2$  Hz) HRMS (ESI):  $\text{C}_{29}\text{H}_{42}\text{BrNNaSn}$  ( $\text{M}+\text{Na}$ ) $^+$  calc: 642.1359 observed: 642.1349

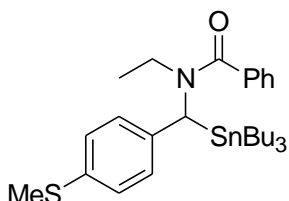 Yield 64%  $^1\text{H}$  NMR (500 MHz,  $\text{CDCl}_3$ ):  $\delta$  7.44-7.41 (m, 5H), 7.26-7.19 (m, 2H), 7.03-7.00 (m, 2H), 3.87 (s,  $J_{\text{Sn-H}} = 53.5$  Hz, 1H), 3.37 (dd,  $J = 14.3, 7.1$  Hz, 1H), 3.23 (dd,  $J = 14.3, 7.1$  Hz, 1H), 2.46 (s, 3H), 1.47-1.36 (m, 6H), 1.30-1.22 (m, 6H), 1.07 (m, 3H), 0.92-0.79 (m, 15H).  $^{13}\text{C}$  NMR (126 MHz;  $\text{CDCl}_3$ ):  $\delta$  172.4, 141.3, 136.7, 133.4, 129.3, 128.6, 127.7<sub>2</sub>, 127.6<sub>8</sub>, 127.6<sub>5</sub>, 126.1, 125.2<sub>5</sub>, 125.1<sub>9</sub>, 50.6 ( $J_{\text{Sn-C}} = 296.1$  Hz), 46.3

( $J_{Sn-C} = 18.0$  Hz), 29.0 ( $J_{Sn-C} = 19.0$  Hz), 27.5 ( $J_{Sn-C} = 58.9$  Hz), 16.7, 14.1, 13.7, 12.4 ( $J_{Sn-C} = 341.7$  Hz) HRMS (ESI):  $C_{29}H_{45}NNaOSSn$  (M+Na) $^{+}$  calc: 598.2140 observed: 598.2144

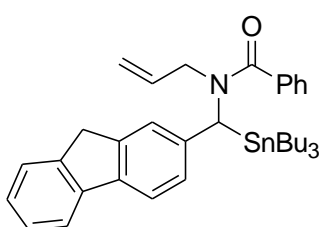

Yield 77%  $^1H$  NMR (500 MHz;  $CDCl_3$ ):  $\delta$  7.75-7.73 (m, 1H), 7.69 (d,  $J = 7.9$  Hz, 1H), 7.53-7.49 (m, 3H), 7.45-7.42 (m, 3H), 7.37-7.34 (m, 1H), 7.28-7.24 (m, 2H), 7.09 (dd,  $J = 7.9, 1.2$  Hz, 1H), 5.79-5.72 (m, 1H), 5.26-5.16 (m, 2H), 4.07 (m,  $J = 2.0$  Hz, 1H), 4.03 (s,  $J_{Sn-H} = 54.0$  Hz, 1H), 3.88 (d,  $J = 3.7$  Hz,  $J_{Sn-H} = 53.0$  Hz, 2H), 3.70 (s, 1H), 1.48-1.37 (m, 6H), 1.25 (m, 6H), 0.94-0.79 (m, 15H).  $^{13}C$  NMR (126 MHz,  $CDCl_3$ ):  $\delta$  172.8, 143.8, 143.0, 142.2, 141.8, 138.5, 136.3, 133.3, 129.6, 128.5, 126.6, 126.4, 126.0, 124.9, 123.8, 121.6, 119.8, 119.4, 118.0, 53.7 ( $J_{Sn-C} = 19.0$  Hz), 50.9 ( $J_{Sn-C} = 297.9$  Hz), 29.1 ( $J_{Sn-C} = 18.6$  Hz), 27.5 ( $J_{Sn-C} = 60.9$  Hz), 13.7, 12.4 ( $J_{Sn-C} = 342.5$  Hz) HRMS (ESI):  $C_{36}H_{47}NNaOSn$  (M+Na) $^{+}$  calc: 652.2579 observed: 652.2584

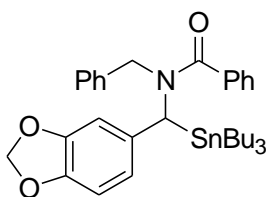

Yield 75%  $^1H$  NMR (500 MHz;  $CDCl_3$ ):  $\delta$  7.49-7.47 (m, 2H), 7.41-7.28 (m, 6H), 7.15-7.13 (m, 2H), 6.73 (d,  $J = 8.0$  Hz, 1H), 6.62 (d,  $J = 1.8$  Hz, 1H), 6.48 (m,  $J = 0.4$  Hz, 1H), 5.93 (q,  $J = 1.4$  Hz, 2H), 4.78 (d,  $J = 15.7$  Hz, 1H), 4.14 (d,  $J = 15.7$  Hz, 1H), 3.67 (s,  $J_{Sn-H} = 53.0$  Hz, 1H), 1.40-1.26 (m, 7H), 1.25-1.17 (m, 6H), 0.88-0.76 (m, 16H).  $^{13}C$  NMR (126 MHz;  $CDCl_3$ ):  $\delta$  172.9, 147.8, 144.9, 137.1, 136.5, 136.1, 129.6, 128.74, 128.65, 127.7, 127.3, 126.4, 118.1, 108.2, 106.2, 100.7, 53.9 ( $J_{Sn-C} = 19.2$  Hz), 49.5 ( $J_{Sn-C} = 305.3$  Hz), 29.0 ( $J_{Sn-C} = 18.4$  Hz), 27.5 ( $J_{Sn-C} = 61.1$  Hz), 13.8, 12.2 ( $J_{Sn-C} = 344.0$  Hz) HRMS (ESI):  $C_{34}H_{45}NNaO_3Sn$  (M+Na) $^{+}$  calc: 658.2321 observed: 658.2330

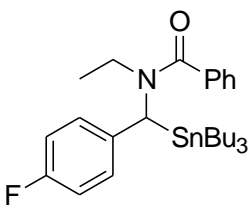

Yield 59%  $^1H$  NMR (500 MHz;  $CDCl_3$ ):  $\delta$  7.43-7.41 (m, 5H), 7.05-7.02 (m, 2H), 6.98-6.95 (m, 2H), 3.87 (s,  $J_{Sn-H} = 53.0$  Hz, 1H), 3.37 (dd,  $J = 14.3, 7.2$  Hz, 1H), 3.23 (dd,  $J = 14.3, 7.1$  Hz, 1H), 1.47-1.36 (m, 6H), 1.26 (dq,  $J = 14.7, 7.3$  Hz, 6H), 1.08 (t,  $J = 7.1$  Hz, 3H),

0.94-0.78 (m, 15H).  $^{13}\text{C}$  NMR (126 MHz,  $\text{CDCl}_3$ ):  $\delta$  172.4, 161.4, 159.4, 139.5 (d,  $J_{\text{C-F}} = 2.9\text{ Hz}$ ), 136.6, 129.3, 128.6, 126.1, 125.9 (d,  $J_{\text{C-F}} = 7.7\text{ Hz}$ ), 115.1 (d,  $J_{\text{C-F}} = 21.2\text{ Hz}$ ), 50.2 ( $J_{\text{Sn-C}} = 298.5\text{ Hz}$ ), 46.2 ( $J_{\text{Sn-C}} = 17.9\text{ Hz}$ ), 29.0 ( $J_{\text{Sn-C}} = 18.9\text{ Hz}$ ), 27.5 ( $J_{\text{Sn-C}} = 59.2\text{ Hz}$ ), 14.1, 13.7, 12.3 ( $J_{\text{Sn-C}} = 335.0\text{ Hz}$ ) HRMS (ESI):  $\text{C}_{28}\text{H}_{42}\text{FNNaOSn}$  ( $\text{M}+\text{Na}$ ) $^+$  calc: 570.2170 observed: 570.2182

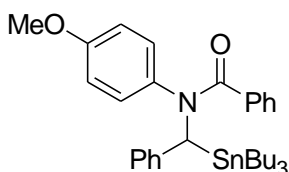

Yield 64%  $^1\text{H}$  NMR (500 MHz;  $\text{CDCl}_3$ ):  $\delta$  7.36-7.24 (m, 4H), 7.24-7.08 (m, 6H), 6.83 (d,  $J = 8.8\text{ Hz}$ , 2H), 6.62 (d,  $J = 8.8\text{ Hz}$ , 2H), 4.16 (s,  $J_{\text{Sn-H}} = 53.0\text{ Hz}$ , 1H), 3.72-3.66 (m, 3H), 1.55-1.36 (m, 6H), 1.37-1.21 (m, 6H), 1.04-0.79 (m, 15H).  $^{13}\text{C}$  NMR (126 MHz;  $\text{CDCl}_3$ ) (broad due to amide rotamers):  $\delta$  171.1, 157.8, 143.8, 138.8, 136.2, 129.7, 128.9, 128.2, 128.1<sub>2</sub>, 128.0<sub>6</sub>, 127.4<sub>6</sub>, 127.4<sub>0</sub>, 126.9, 124.8, 124.0, 114.3, 113.8, 58.7, 55.2, 29.1, 27.6, 13.8, 12.5 HRMS (ESI):  $\text{C}_{33}\text{H}_{45}\text{NNaO}_2\text{Sn}$  ( $\text{M}+\text{Na}$ ) $^+$  calc: 630.2371 observed: 630.2372

### III. Synthesis of $\alpha$ -Amidostannane with $(\text{SnMe}_3)_2$ (Table 1, entry 10)

$(\text{C}_6\text{H}_5)\text{HC}=\text{NCH}_2\text{C}_6\text{H}_5$  (58.6 mg, 0.3 mmol, 1 eq), benzoyl chloride (71.7 mg, 0.45 mmol, 1.5 eq),  $\text{Pd}_2\text{dba}_3\text{CHCl}_3$  (4.7 mg, 0.005 mmol, 1.5 mol %) and benzyl benzoate (ca. 56.0 mg, 0.25 mmol) were combined in 3 mL of THF. The resulting mixture was stirred for 15 min until the disappearance of the initial purple color. A small aliquot of this mixture was taken.  $(\text{SnMe}_3)_2$  (147.4 mg, 0.45 mmol, 1.5 eq) was added dropwise as a solution in 2 mL of THF. The resulting solution was stirred at room temperature for 1 h inside the glovebox. An aliquot of this solution was taken and the yield assessed by  $^1\text{H}$  NMR. The product can be purified by charging the mixture on a column packed with 10% wt.  $\text{K}_2\text{CO}_3/\text{SiO}_2$  and eluting with hexanes: ethyl acetate (gradient 100:1 to 20:1).

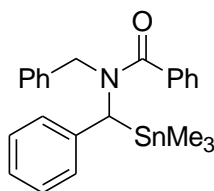

Yield 33% (by  $^1\text{H}$  NMR)  $^1\text{H}$  NMR (500 MHz,  $\text{CDCl}_3$ ):  $\delta$  7.55-7.53 (m, 2H), 7.44-7.35 (m, 5H), 7.31 (dd,  $J = 17.6, 9.9\text{ Hz}$ , 3H), 7.16 (dt,  $J = 8.2, 4.4\text{ Hz}$ , 3H), 7.07-7.06 (m, 2H), 4.88 (d,  $J = 16.0\text{ Hz}$ , 1H), 4.21 (d,  $J = 16.0\text{ Hz}$ , 1H), 3.72 (s,  $J_{\text{Sn-H}} = 59.5\text{ Hz}$ , 1H), 0.06 (s,  $J_{\text{Sn-H}} = 53.5\text{ Hz}$ , 9H).  $^{13}\text{C}$  NMR (126 MHz,  $\text{CDCl}_3$ ):  $\delta$  173.2, 142.3, 136.7, 135.8, 129.7, 128.9, 128.6<sub>7</sub>, 128.5<sub>9</sub>, 127.7, 126.9, 126.5, 124.9<sub>0</sub>, 124.8<sub>8</sub>, 54.0 ( $J_{\text{Sn-C}} = 23.1\text{ Hz}$ ), 51.6 ( $J_{\text{Sn-C}} =$

359.5 Hz), -6.4 ( $J_{Sn-C} = 361.9$  Hz) HRMS (ESI):  $C_{24}H_{28}NOSn$  ( $M+1$ )<sup>+</sup> calc: 466.1192 observed: 466.1183

#### IV. Synthesis of $\alpha$ -Amidostannane and Silane with $Bu_3Sn-SiMe_3$ (Table 1, entry 11)

(4- $CH_3C_6H_4$ )HC=NCH<sub>2</sub>C<sub>6</sub>H<sub>5</sub> (62.8 mg, 0.3 mmol, 1 eq), benzoyl chloride (71.7 mg, 0.45 mmol, 1.5 eq), Pd<sub>2</sub>dba<sub>3</sub>CHCl<sub>3</sub> (4.7 mg, 0.005 mmol, 1.5 mol %) and benzyl benzoate (ca. 56.0 mg, 0.25 mmol) were combined in 3 mL of THF. The resulting mixture was stirred for 15 min until the disappearance of the initial purple color. A small aliquot of this mixture was taken.  $Bu_3Sn-SiMe_3$  (147.4 mg, 0.50 mmol, 1.7 eq) was added dropwise as a solution in 2 mL of THF. The resulting solution was stirred at room temperature for 16 h inside the glovebox. An aliquot of this solution was taken and the yield assessed by <sup>1</sup>H NMR. The products can be purified by charging the mixture on a column packed with 10% wt. K<sub>2</sub>CO<sub>3</sub>/SiO<sub>2</sub> and eluting with hexanes: ethyl acetate (gradient 100:1 to 10:1), providing the amidostannane (**1a**) and amidosilane products.

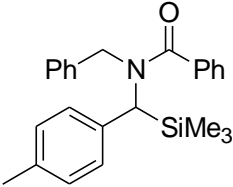 Yield 8% (by <sup>1</sup>H NMR) <sup>1</sup>H NMR (400 MHz, CDCl<sub>3</sub>):  $\delta$  7.49 (dd,  $J = 6.6, 2.9$  Hz, 2H), 7.39-7.35 (m, 5H), 7.32 (d,  $J = 7.1$  Hz, 1H), 7.18 (d,  $J = 7.3$  Hz, 2H), 7.10 (q,  $J = 7.0$  Hz, 4H), 4.70 (d,  $J = 16.0$  Hz, 1H), 3.99 (d,  $J = 16.0$  Hz, 1H), 3.41 (s, 1H), 2.35 (s, 3H), 0.07 (s, 9H). <sup>13</sup>C NMR (126 MHz, CDCl<sub>3</sub>):  $\delta$  172.7, 137.3, 136.9, 136.5, 135.6, 129.5, 129.1, 128.8, 128.6, 127.8, 127.6, 127.1, 126.4, 55.8, 53.6, 27.9, 26.9, 21.1, 17.5, 13.6, 0.0 HRMS (ESI):  $C_{25}H_{29}NNaOSi$  ( $M+Na$ )<sup>+</sup> calc: 410.1911 observed: 410.1915

#### V. Reaction of Complex A with (SnBu<sub>3</sub>)<sub>2</sub>

Complex A [ $Pd(Cl)(\eta^2-CH(C_6H_5)N(CH_2C_6H_5)(COC_6H_5))_2$ ]<sup>3</sup> (4.2 mg, 0.005 mmol) and benzyl benzoate standard (ca. 12.0 mg, 0.05 mmol) were dissolved in CD<sub>2</sub>Cl<sub>2</sub> (1 mL) in a J-Young NMR tube. An initial NMR was taken of this mixture. (SnBu<sub>3</sub>)<sub>2</sub> (34.8 mg, 0.06 mmol) was dissolved in minimal CD<sub>2</sub>Cl<sub>2</sub> and added dropwise to the NMR tube, eliciting the solution to immediately turn purple. The reaction was allowed to stand for 1 h at room temperature and the yield (49%) of amidostannane was determined by <sup>1</sup>H NMR analysis.



## VI. Typical Synthesis of $\alpha$ -Amido Acid Derivatives

In a flame dried 25 mL Schlenk flask, under argon, the  $\alpha$ -amidostannane from Table 2, entry 3 (66.8 mg, 0.123 mmol, 1 eq) was dissolved in 2 mL of dry THF. The flask was cooled to  $-78^{\circ}\text{C}$  and *n*-butyllithium (1.5 M, 85.0  $\mu\text{L}$ , 0.128 mmol, 1.05 eq) was added dropwise, during which the reaction solution turned purple. The solution was stirred for 15 min at  $-78^{\circ}\text{C}$ . At this point, the flow of argon gas was stopped and  $\text{CO}_2$  (gas) was purged into the flask until the disappearance of the purple color (5 min). The flask was then replaced under an argon atmosphere and allowed to warm to ambient temperature.  $\text{NaHSO}_4$  (10% wt., 5 mL) was then slowly added to quench the reaction. The organic layer was extracted with EtOAc (3 x 10 mL) and the combined organic fractions were dried with  $\text{MgSO}_4$ , filtered and concentrated to give an off-white residue. The residue was dissolved in a minimal amount of dichloromethane (0.5 mL) and pentane (20 mL) was carefully layered on top of the solution. This mixture was allowed to stand in a  $-10^{\circ}\text{C}$  freezer for 24 h, eliciting the formation of a white precipitate. The pentane was decanted and the precipitate was further washed with pentane to afford amino-acid derivative (24.8 mg, 0.079 mmol, 65%) as a white solid.

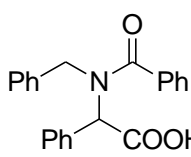 Yield 69%  $^1\text{H}$  NMR (400 MHz,  $\text{CDCl}_3$ ):  $\delta$  7.53-7.51 (m, 2H), 7.43-7.35 (m, 5H), 7.35-7.30 (m, 4H), 7.22-7.17 (m, 2H), 7.06 (d,  $J = 6.4$  Hz, 2H), 5.35-5.34 (br s, 1H), 4.82 (dd  $J = 16.1$ , 1H), 4.34 (d,  $J = 16.5$  Hz, 1H).  $^{13}\text{C}$  NMR (126 MHz;  $\text{CDCl}_3$ ) (broad due to amide rotamers):  $\delta$  173.6, 172.8, 136.2, 135.1, 133.3, 130.4, 129.4, 128.9, 128.7, 128.6 (2 carbons), 127.5, 127.0<sub>1</sub>, 126.9<sub>7</sub>, 63.9, 53.2 HRMS (ESI):  $\text{C}_{22}\text{H}_{20}\text{O}_3\text{N}$  ( $\text{M}+1$ )<sup>+</sup> calc: 346.14377 observed: 346.14324

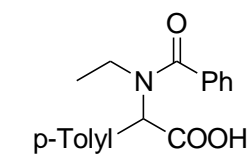 Yield 65%  $^1\text{H}$  NMR (400 MHz,  $\text{CDCl}_3$ ):  $\delta$  7.48-7.39 (m, 5H), 7.34-7.30 (m, 1H), 7.19 (t,  $J = 8.6$  Hz, 2H), 5.71 (s, 1H), 3.43-3.29 (m, 2H), 2.36 (s, 3H), 0.90 (t,  $J = 7.1$  Hz, 3H).  $^{13}\text{C}$  NMR (126 MHz;  $\text{CDCl}_3$ ) (broad due to amide rotamers):  $\delta$  173.8, 173.5, 138.6, 135.7, 130.7, 129.9, 129.5, 128.9, 128.5, 126.6, 63.1, 43.8, 21.2, 14.8 HRMS (ESI):  $\text{C}_{18}\text{H}_{20}\text{O}_3\text{N}$  ( $\text{M}+1$ )<sup>+</sup> calc: 298.14377 observed: 298.14328

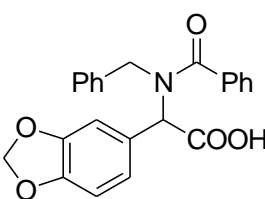
 Yield 69%  $^1\text{H}$  NMR (400 MHz,  $\text{CDCl}_3$ ):  $\delta$  7.58-7.51 (m, 2H), 7.47-7.33 (m, 3H), 7.11 (dd,  $J = 7.3, 3.7$  Hz, 2H), 6.97-6.92 (m, 1H), 6.77-6.70 (m, 2H), 5.95 (d,  $J = 5.4$  Hz, 2H), 5.23 (s, 1H), 4.83 (d,  $J = 16.6$  Hz, 1H), 4.36 (d,  $J = 16.4$  Hz, 1H).  $^{13}\text{C}$  NMR (75 MHz;  $\text{CDCl}_3$ ) (broad due to amide rotamers):  $\delta$  173.6, 173.4, 147.97, 147.88, 136.3, 135.0, 130.3, 128.8, 128.6, 127.5, 126.99, 126.93, 123.7, 110.0, 108.1, 101.3, 77.2, 63.2, 52.7 HRMS (ESI):  $\text{C}_{23}\text{H}_{20}\text{O}_5\text{N}$  ( $\text{M}+1$ ) $^+$  calc: 390.13360 observed: 390.13297

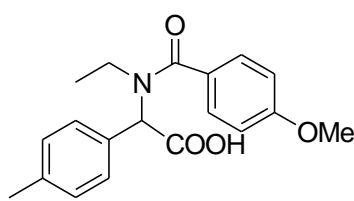
 Yield 82%  $^1\text{H}$  NMR (400 MHz,  $\text{CDCl}_3$ ):  $\delta$  7.48 (d,  $J = 8.5$  Hz, 2H), 7.31-7.28 (m, 1H), 7.19 (d,  $J = 7.9$  Hz, 2H), 6.93 (d,  $J = 8.7$  Hz, 2H), 5.58 (s, 1H), 3.84 (s, 3H), 3.56-3.40 (m, 2H), 2.35 (s, 3H), 1.01 (t,  $J = 6.9$  Hz, 3H).  $^{13}\text{C}$  NMR (75 MHz;  $\text{CDCl}_3$ ) (broad due to amide rotamers):  $\delta$  173.9, 172.8, 161.4, 138.5, 130.8, 129.5, 129.1, 128.0, 127.3, 113.9, 64.9, 55.4, 45.3, 21.1, 14.5 HRMS (ESI):  $\text{C}_{19}\text{H}_{22}\text{O}_4\text{N}$  ( $\text{M}+1$ ) $^+$  calc: 328.15433 observed: 328.15364

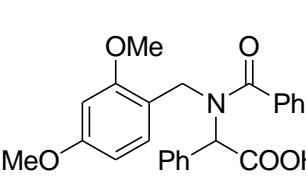
 Yield 79%  $^1\text{H}$  NMR (500 MHz,  $\text{CDCl}_3$ ):  $\delta$  7.60-7.58 (m, 2H), 7.48-7.41 (m, 3H), 7.41-7.38 (m, 2H), 7.34-7.29 (m, 3H), 7.07 (d,  $J = 8.3$  Hz, 1H), 6.42 (dd,  $J = 8.3, 2.4$  Hz, 1H), 6.35 (d,  $J = 2.3$  Hz, 1H), 5.20 (s, 1H), 4.81 (d,  $J = 15.3$  Hz, 1H), 4.42 (d,  $J = 15.3$  Hz, 1H), 3.78 (s, 3H), 3.68 (d,  $J = 10.3$  Hz, 3H).  $^{13}\text{C}$  NMR (126 MHz;  $\text{CDCl}_3$ ) (broad due to amide rotamers):  $\delta$  174.6, 171.5, 161.1, 158.4, 135.0, 134.0, 130.8, 130.2, 128.5<sub>1</sub>, 128.4<sub>6</sub>, 128.3, 128.0, 127.6, 104.1, 98.5, 66.0, 55.3, 55.0, 51.9 HRMS (ESI):  $\text{C}_{24}\text{H}_{24}\text{O}_5\text{N}$  ( $\text{M}+1$ ) $^+$  calc: 406.16490 observed: 406.16421

## VII. References

1. Zaleskiy, S. S.; Ananikov, V. P. *Organometallics* **2012**, *31*, 2302-2309.
2. Layer, R. W. *Chem. Rev.* **1963**, *63*, 489-510.
3. Dhawan, R.; Dghaym, R. D.; Arndtsen, B. A. J. *Am. Chem. Soc.* **2003**, *125*, 1474-1475

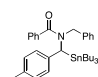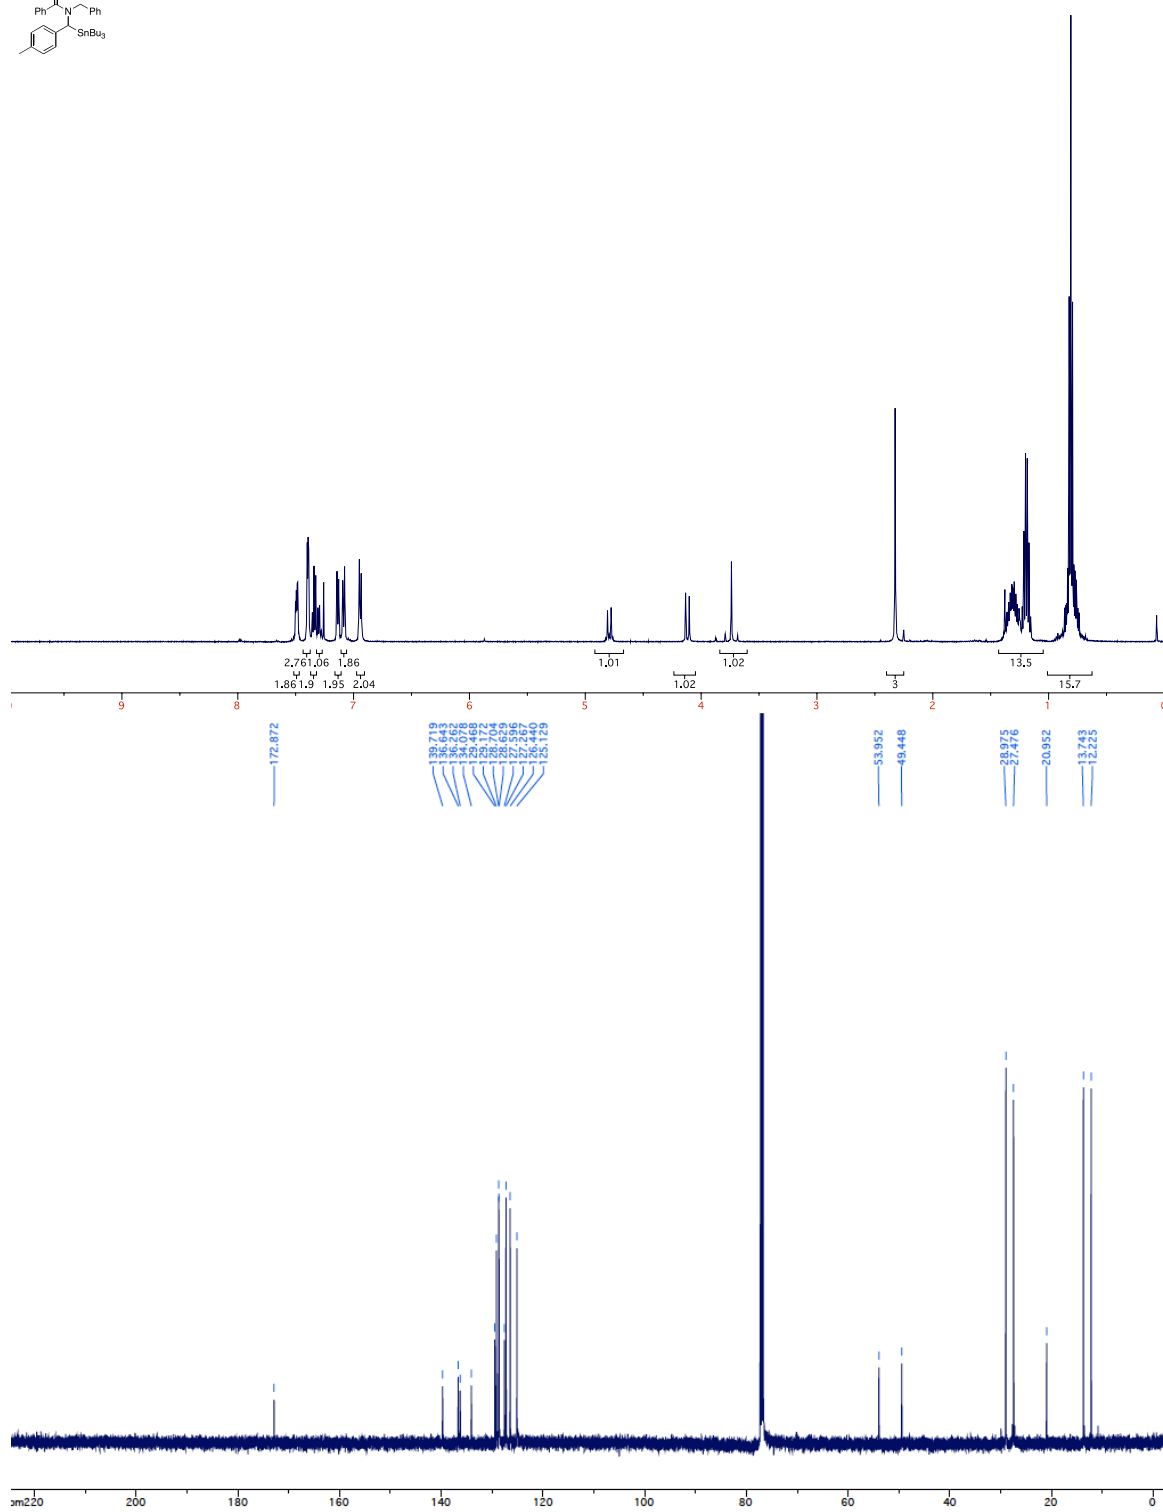

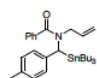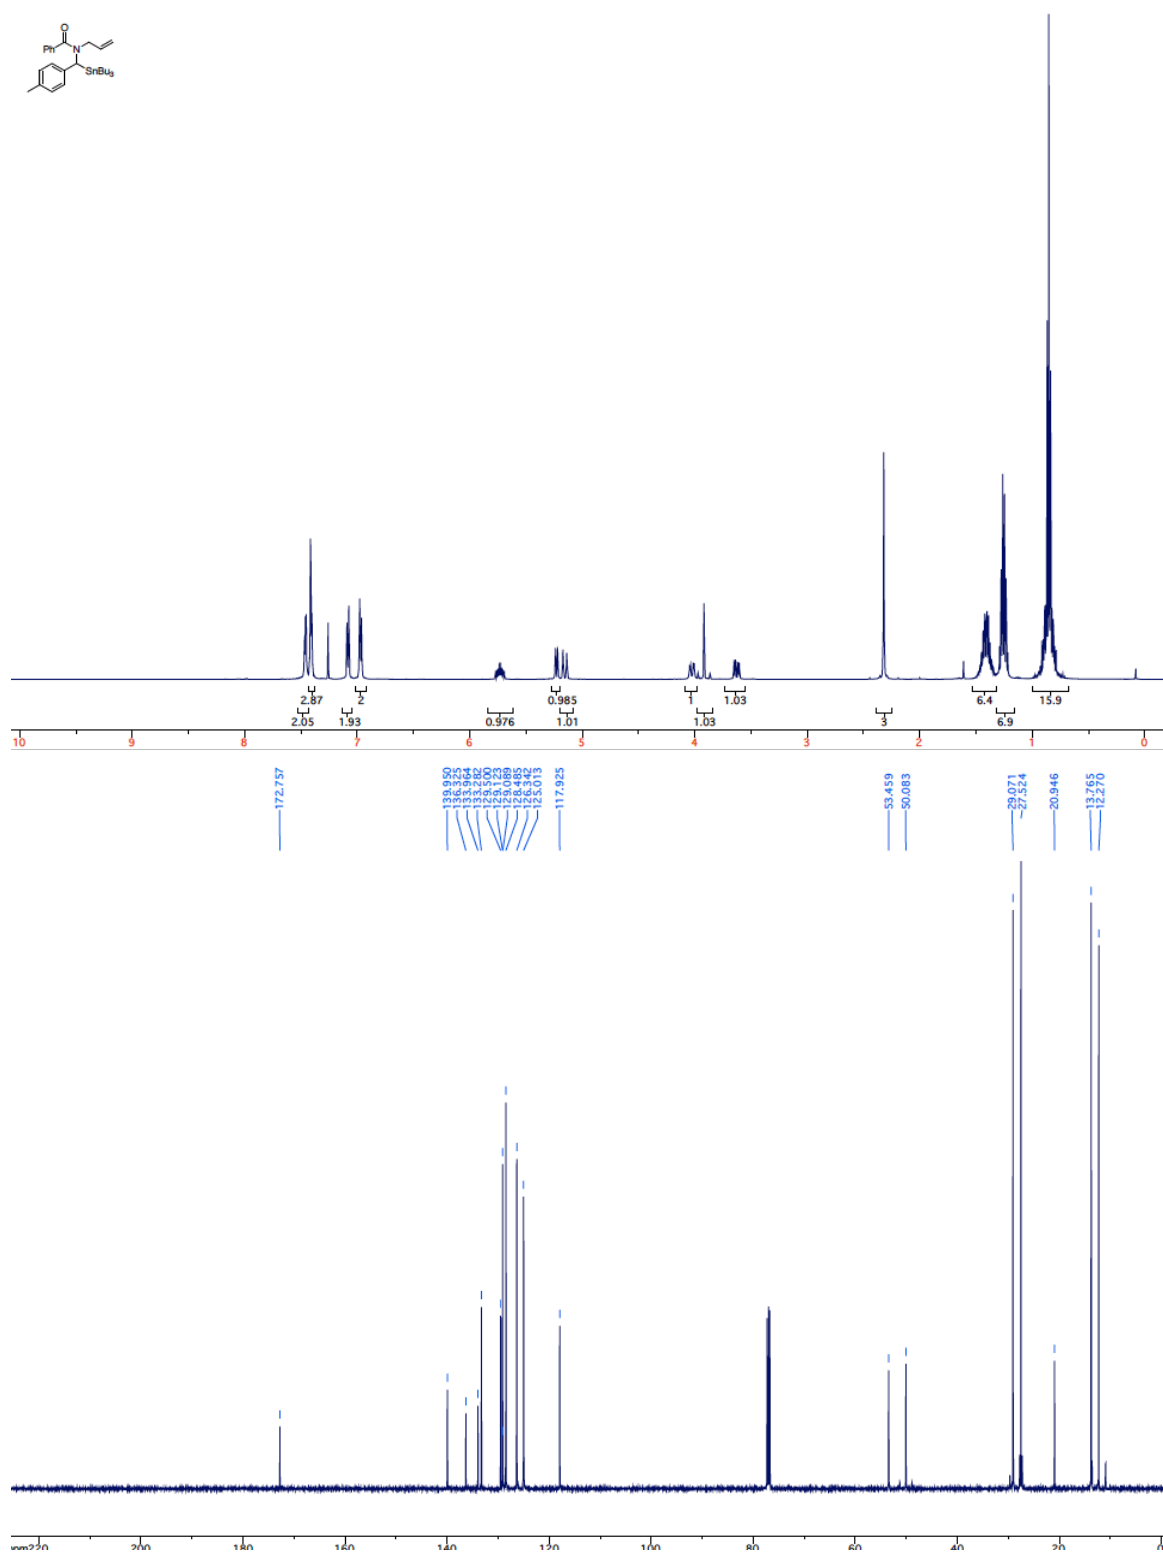

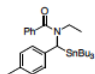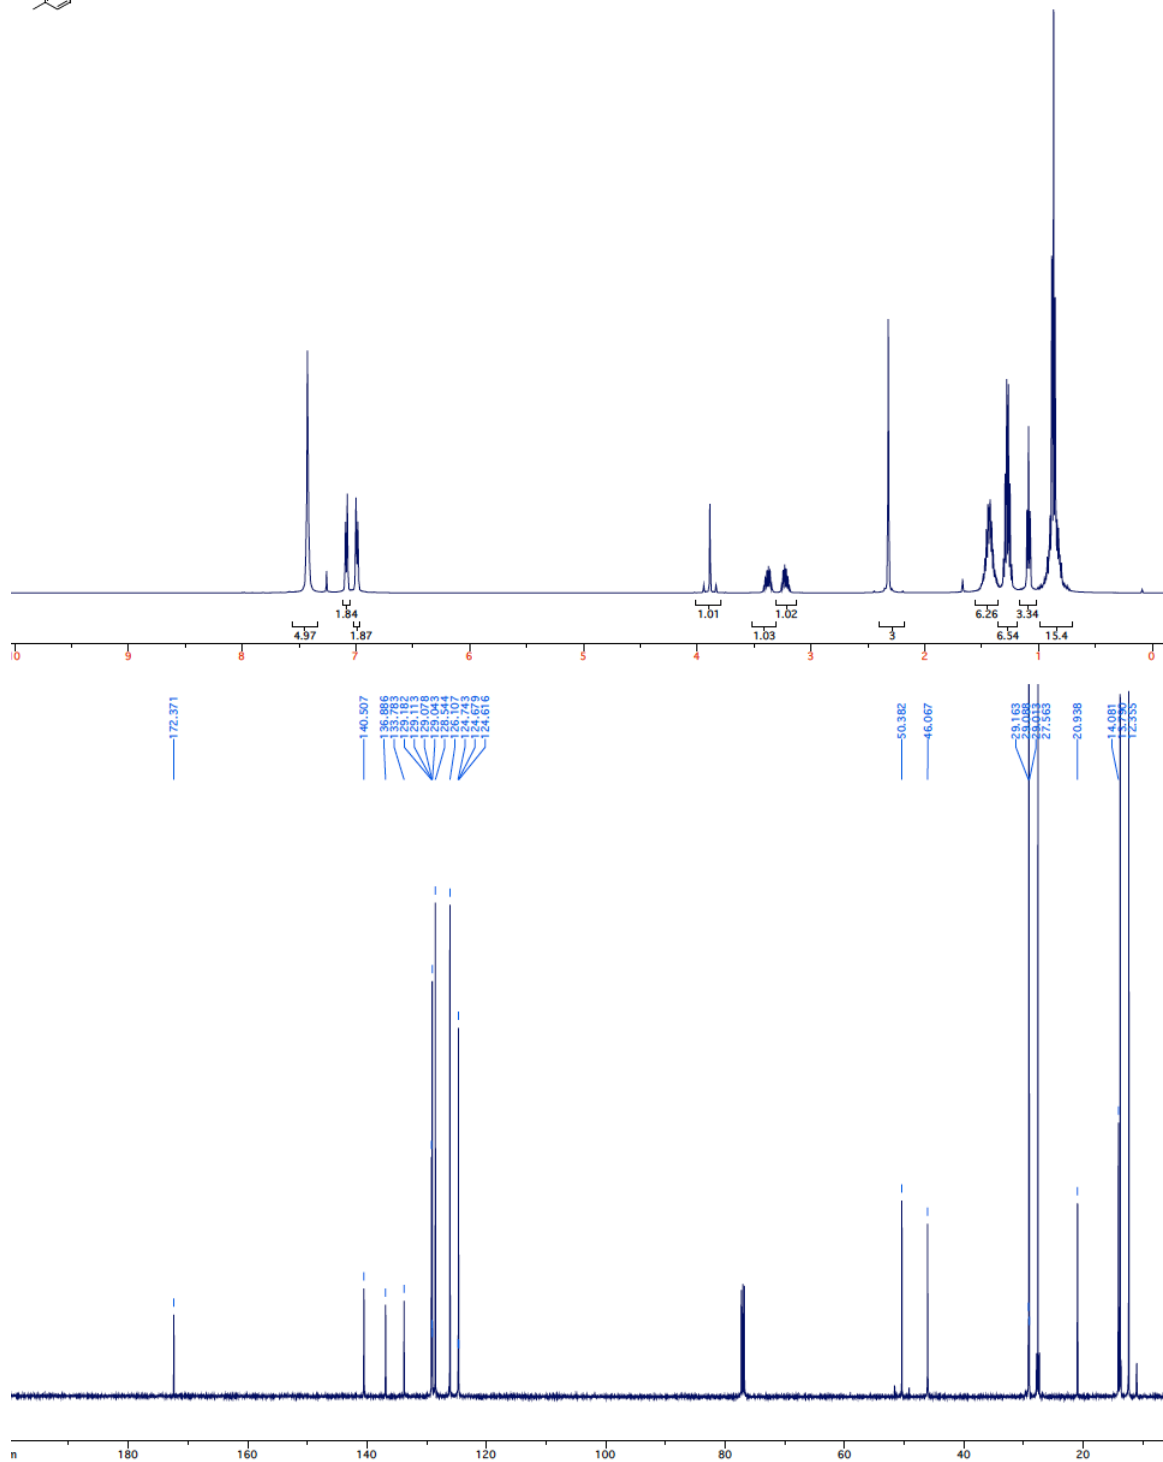

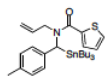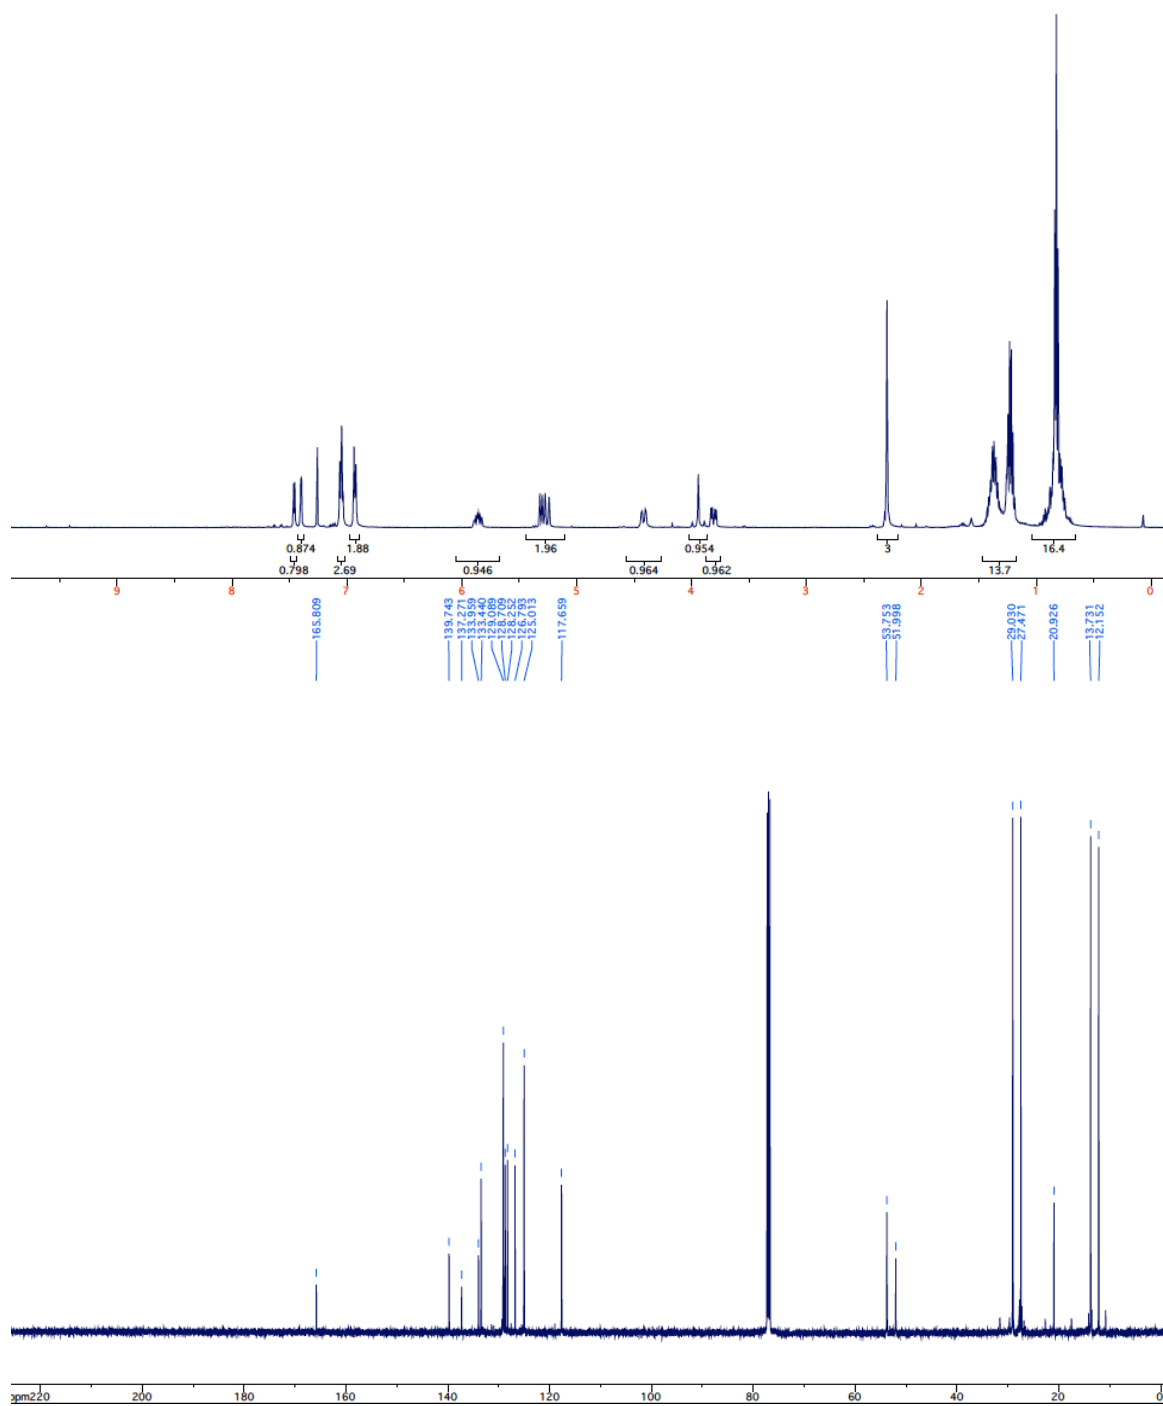

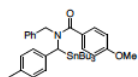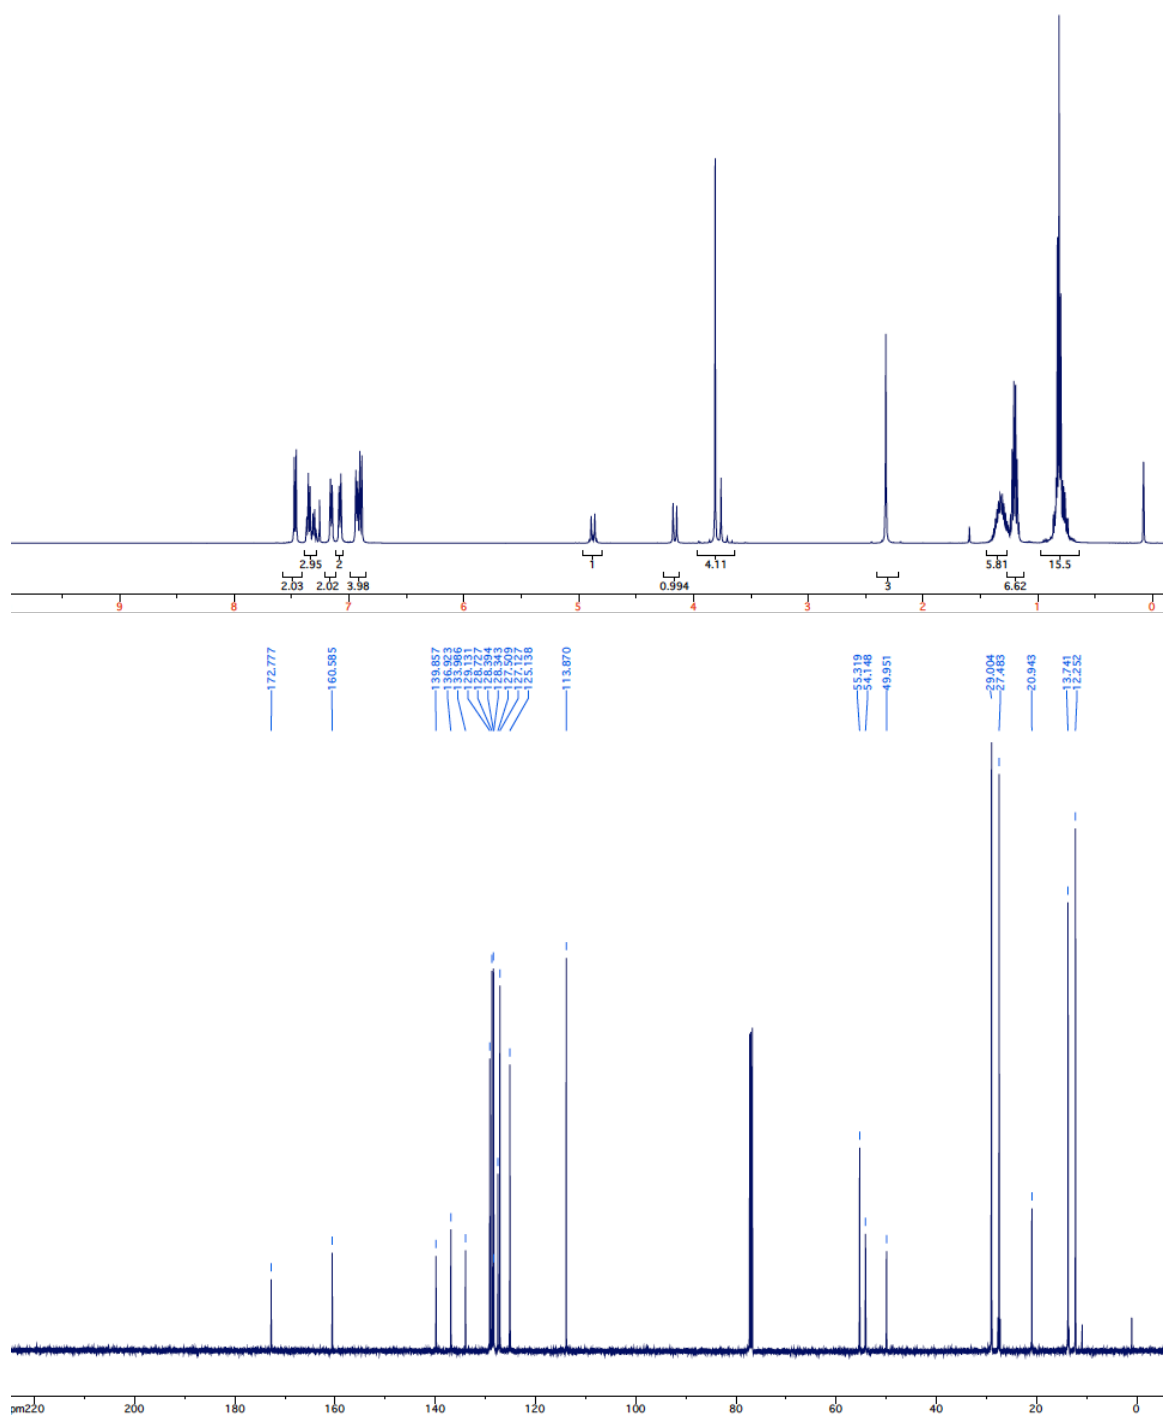

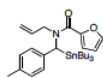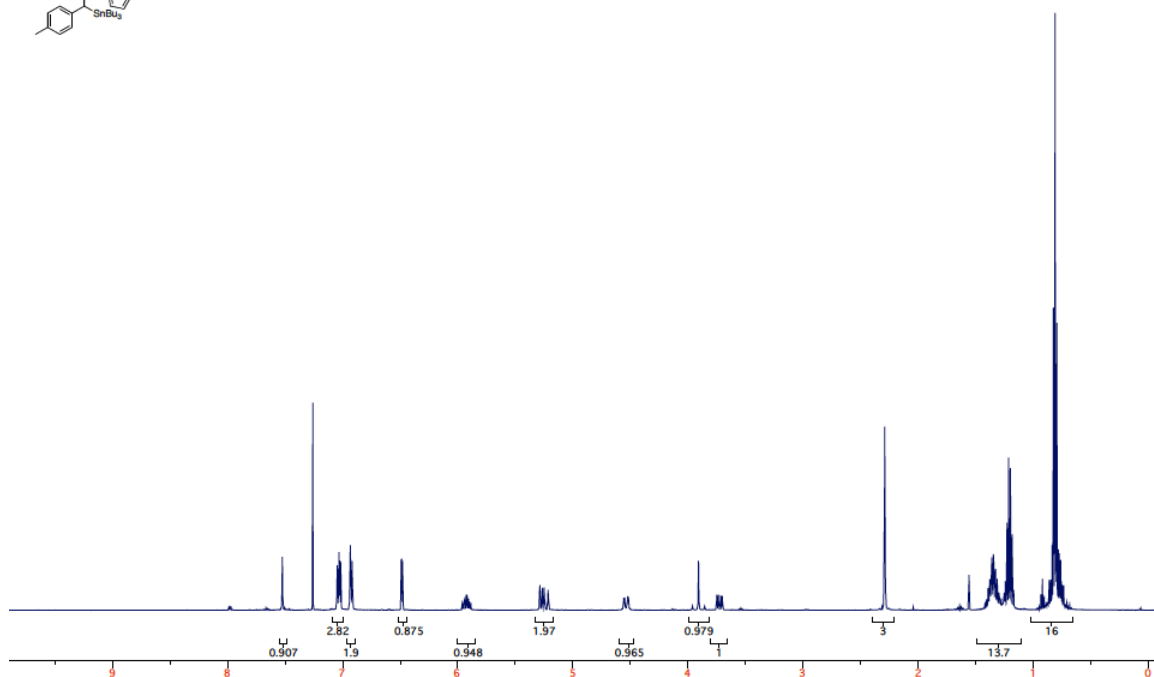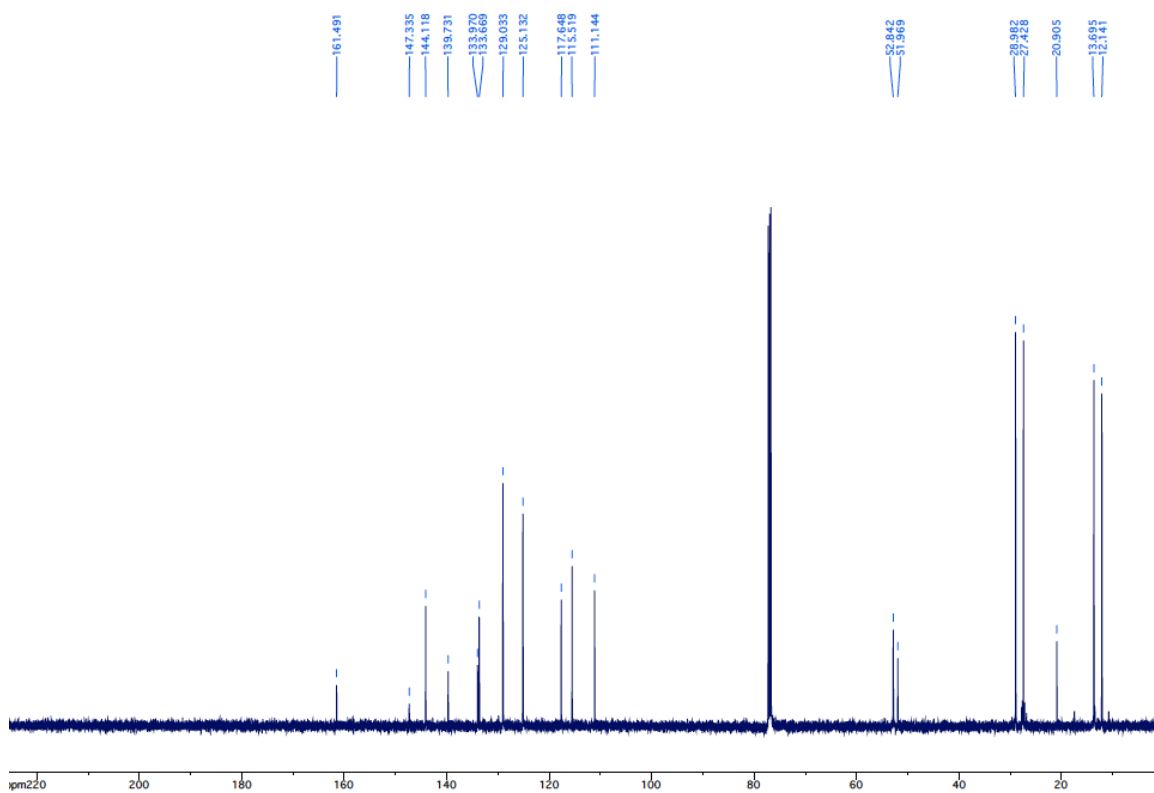



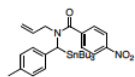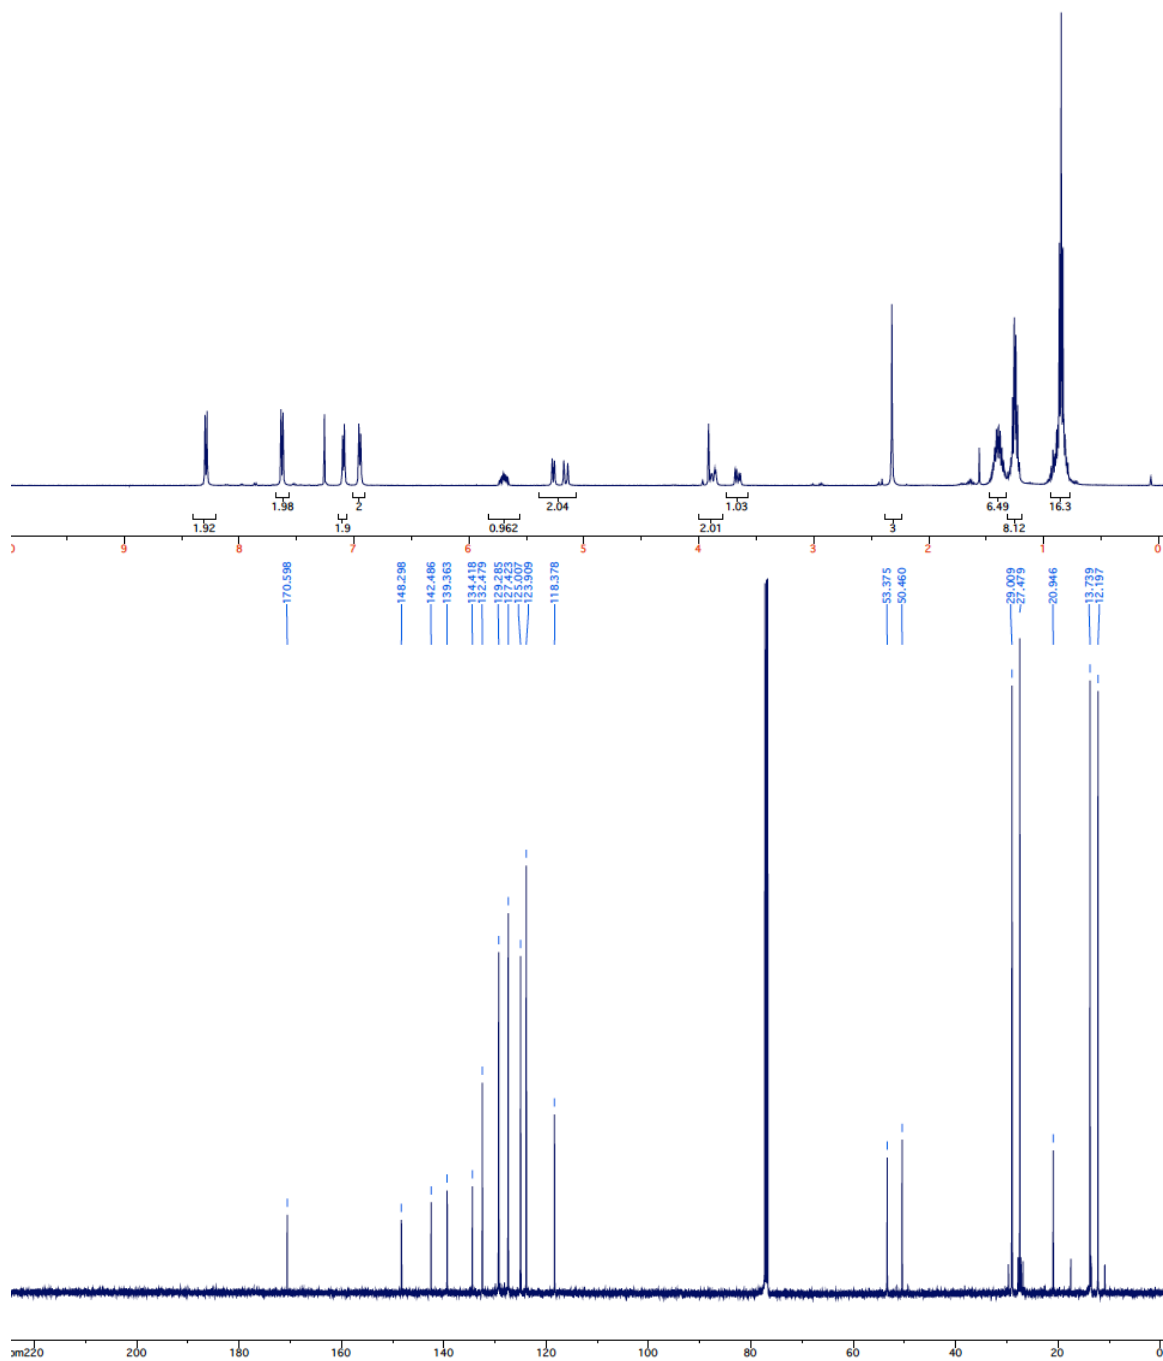

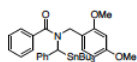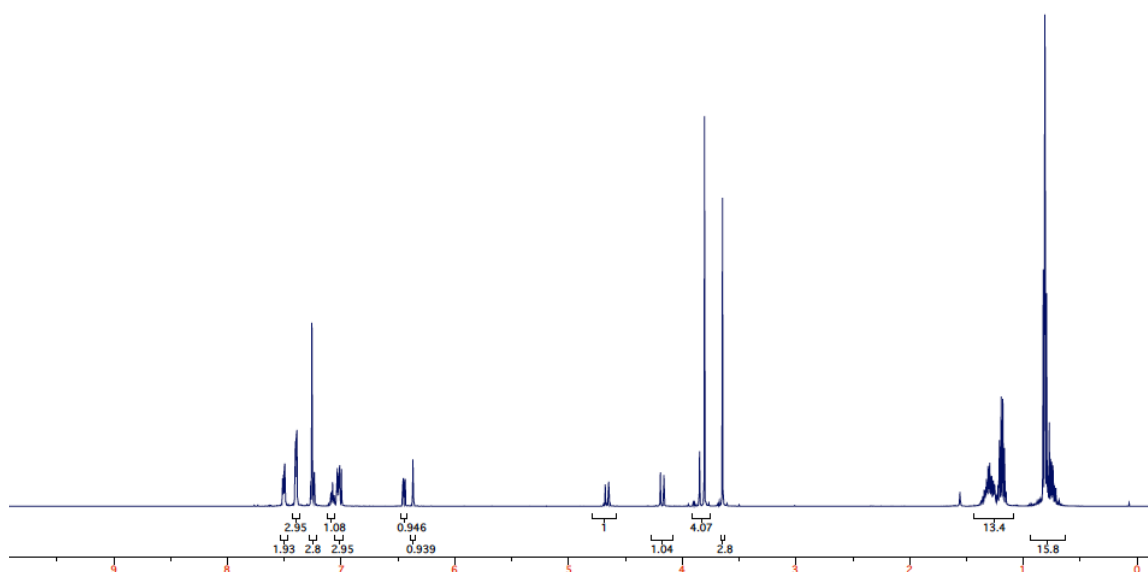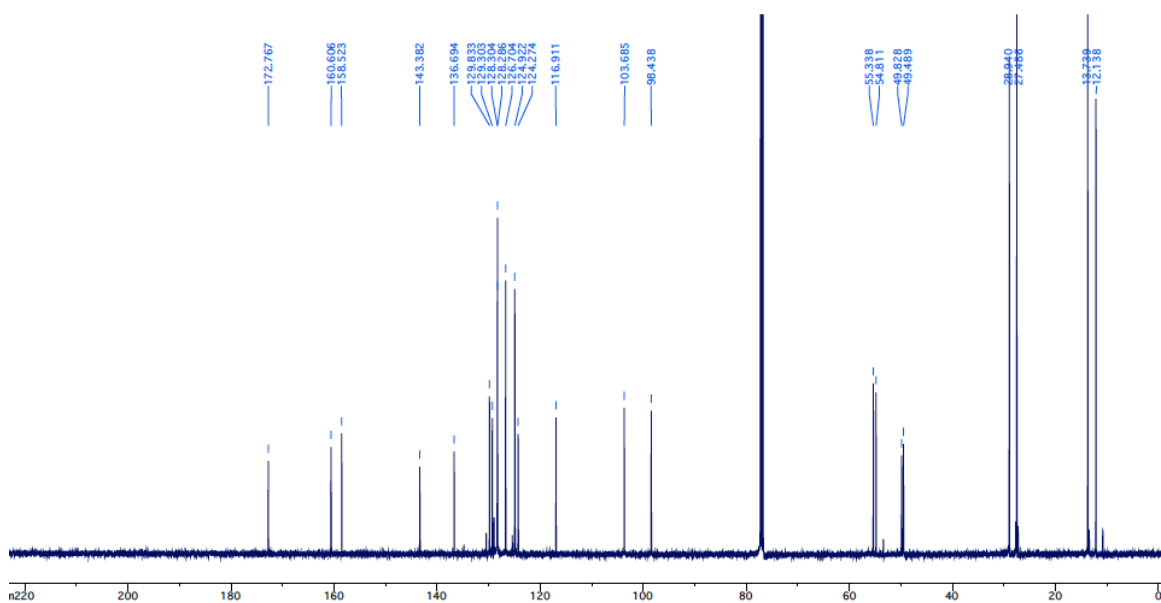

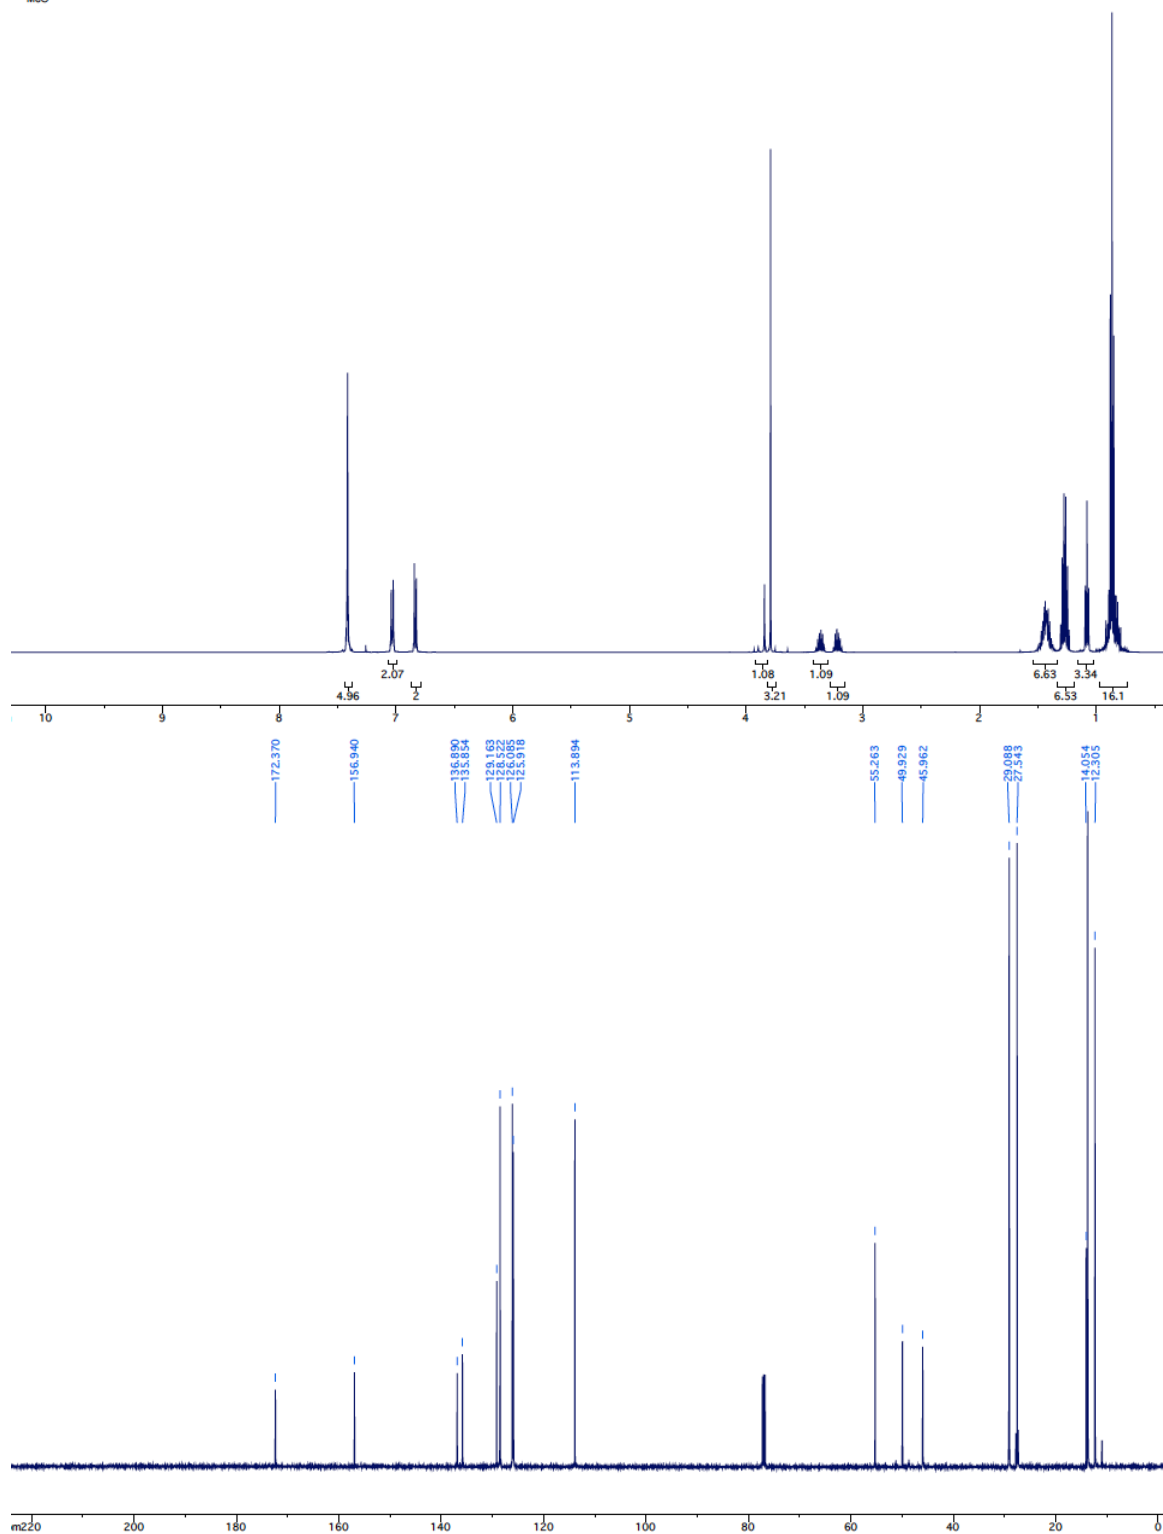

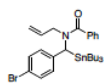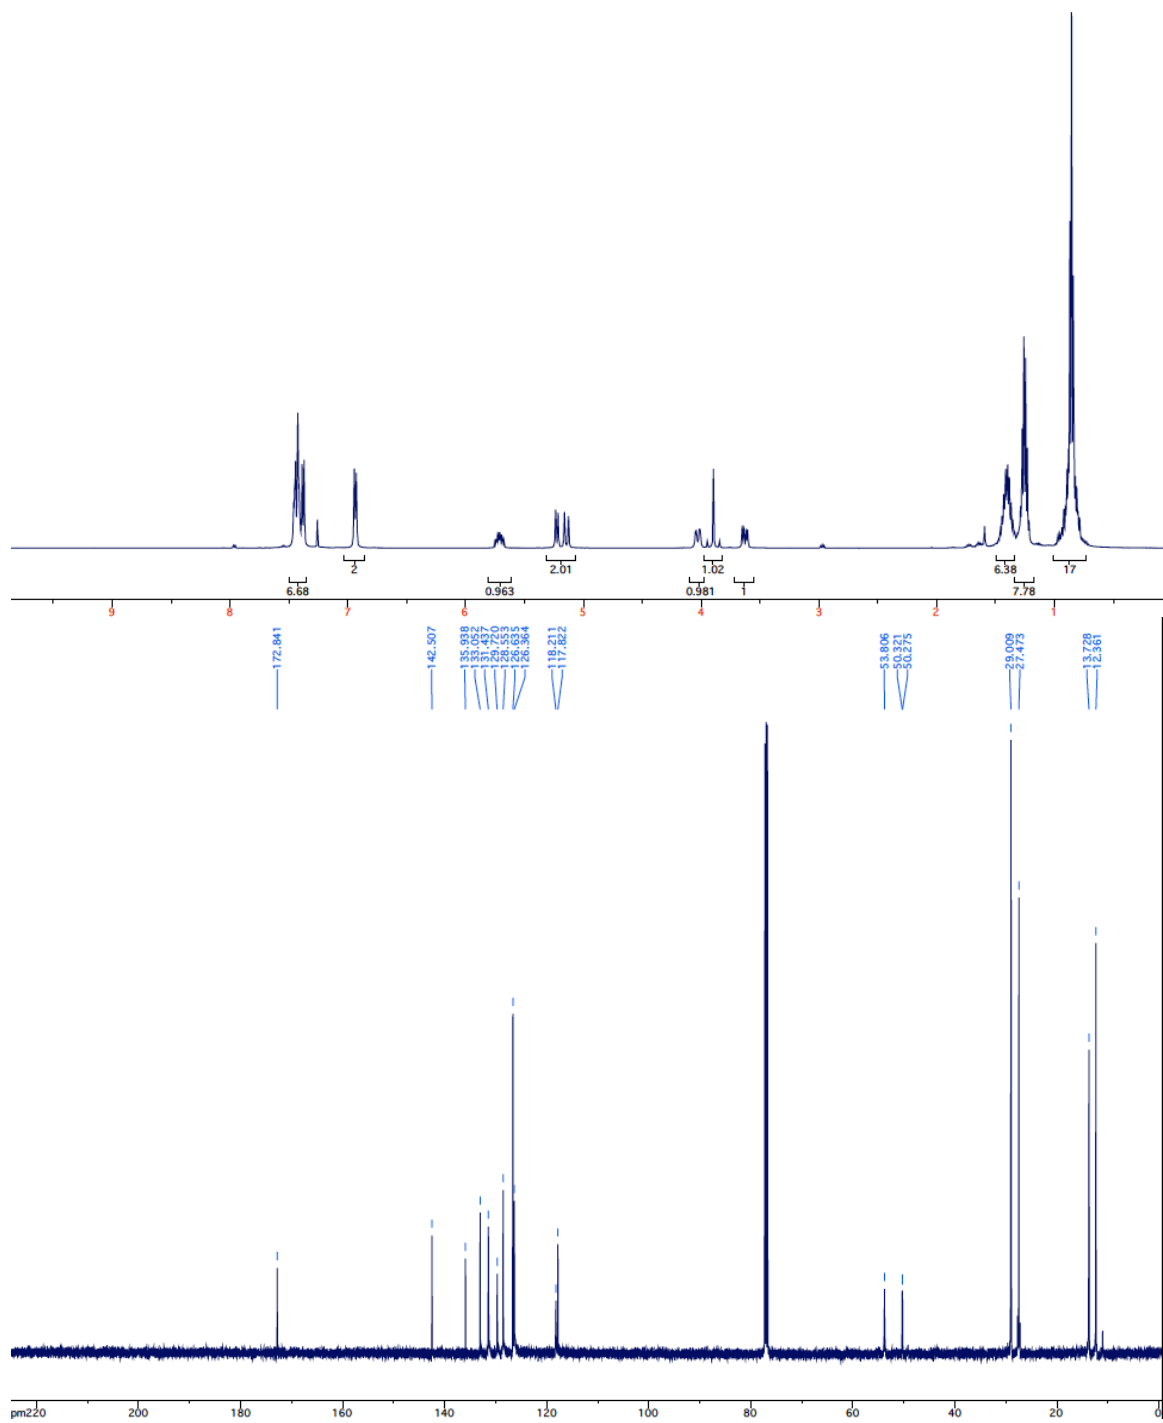

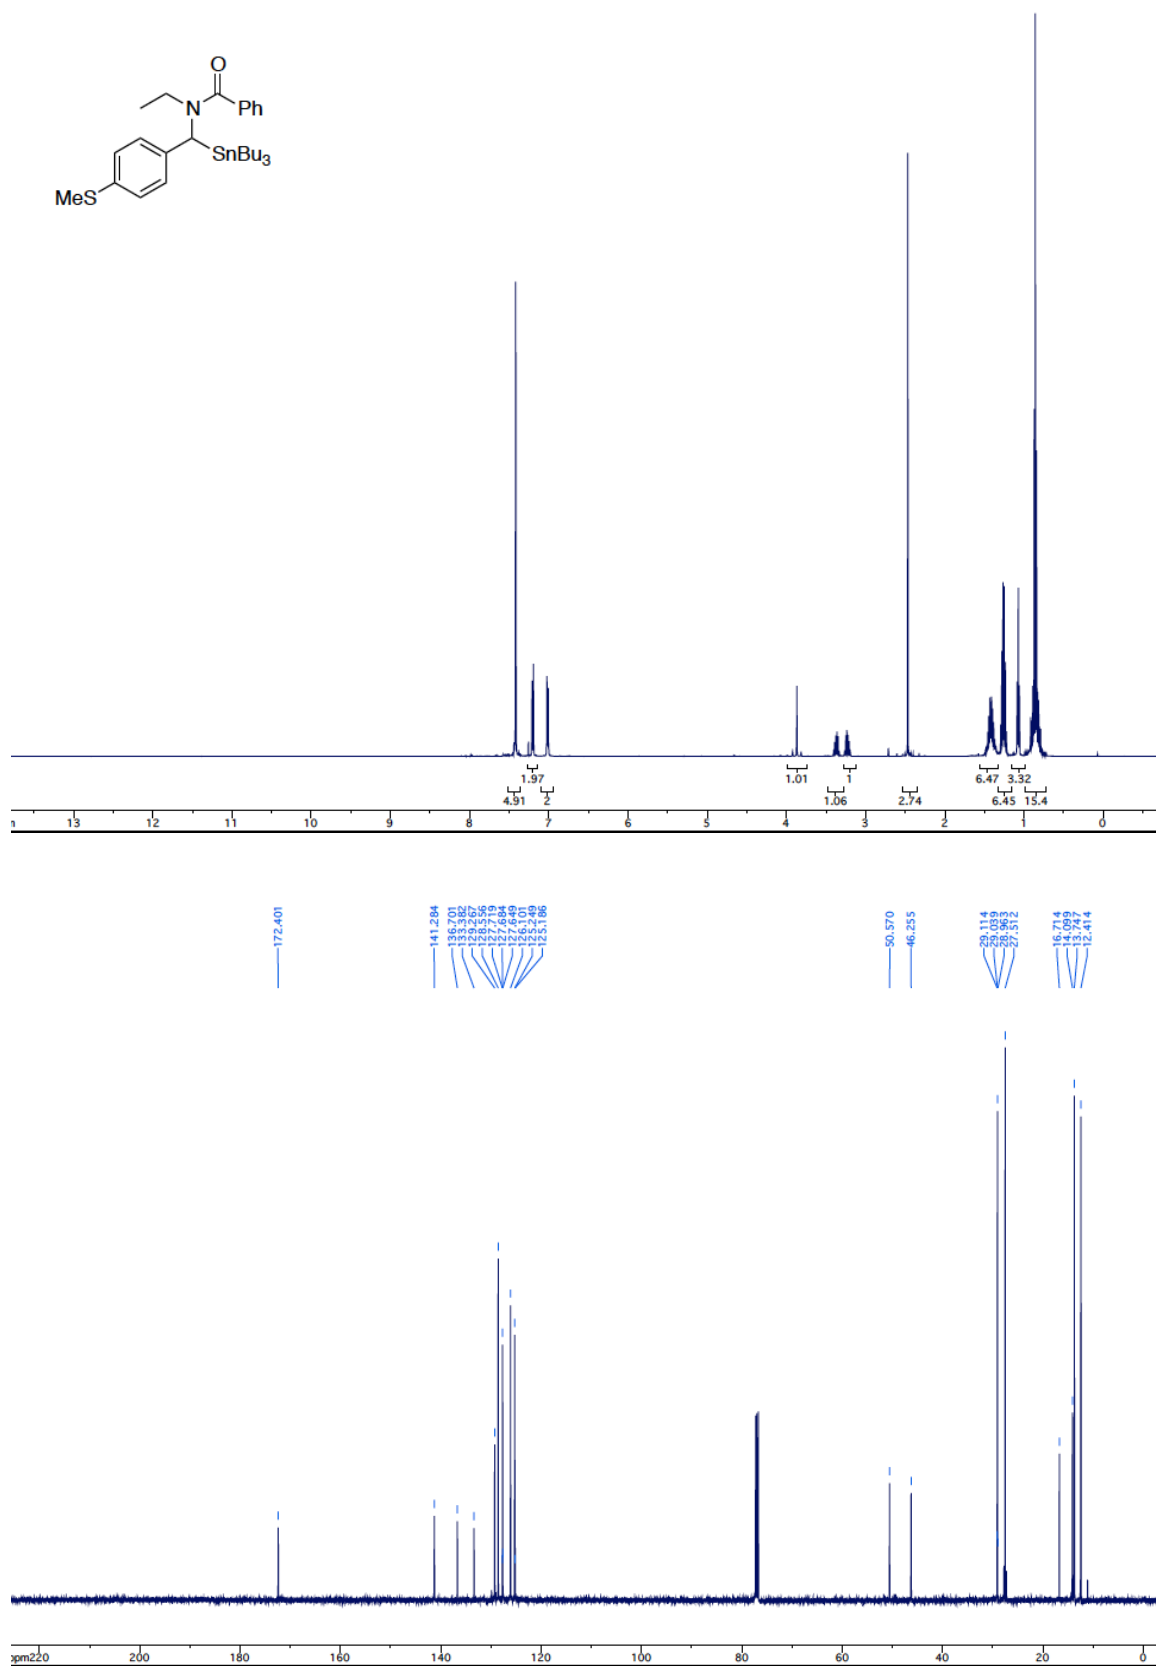

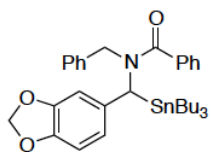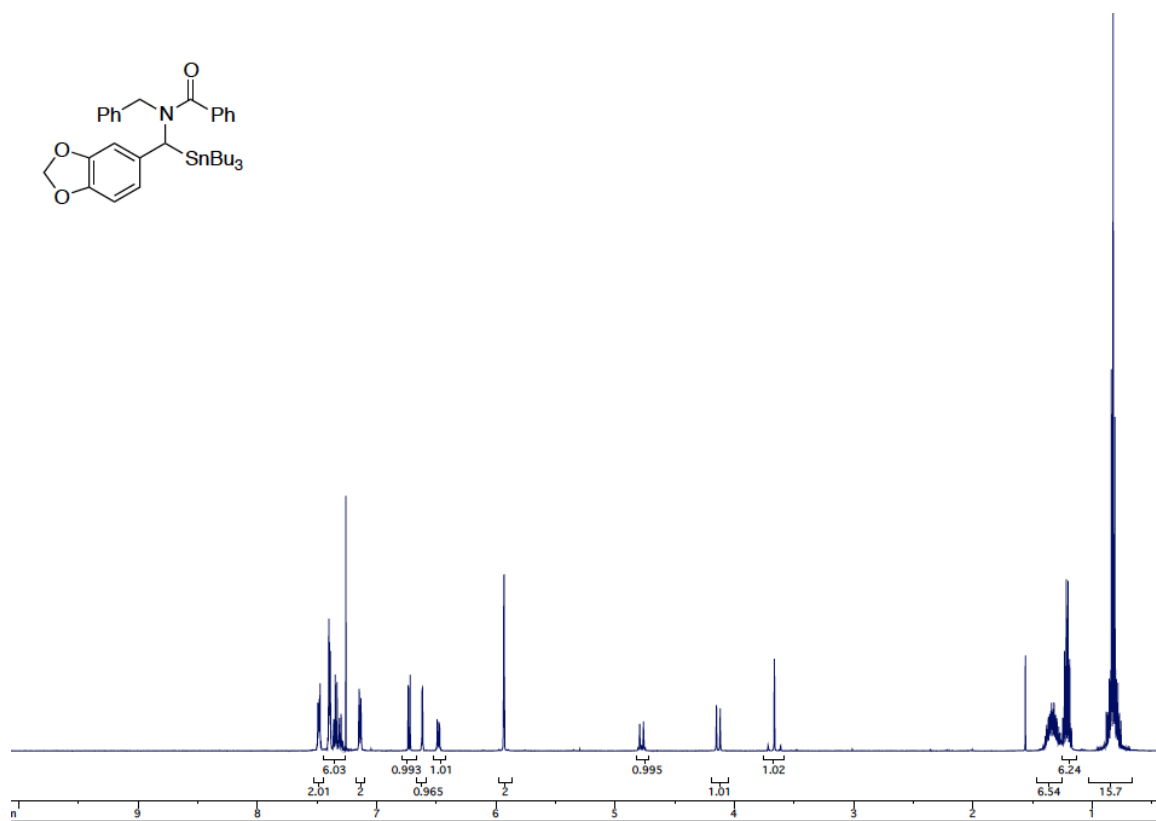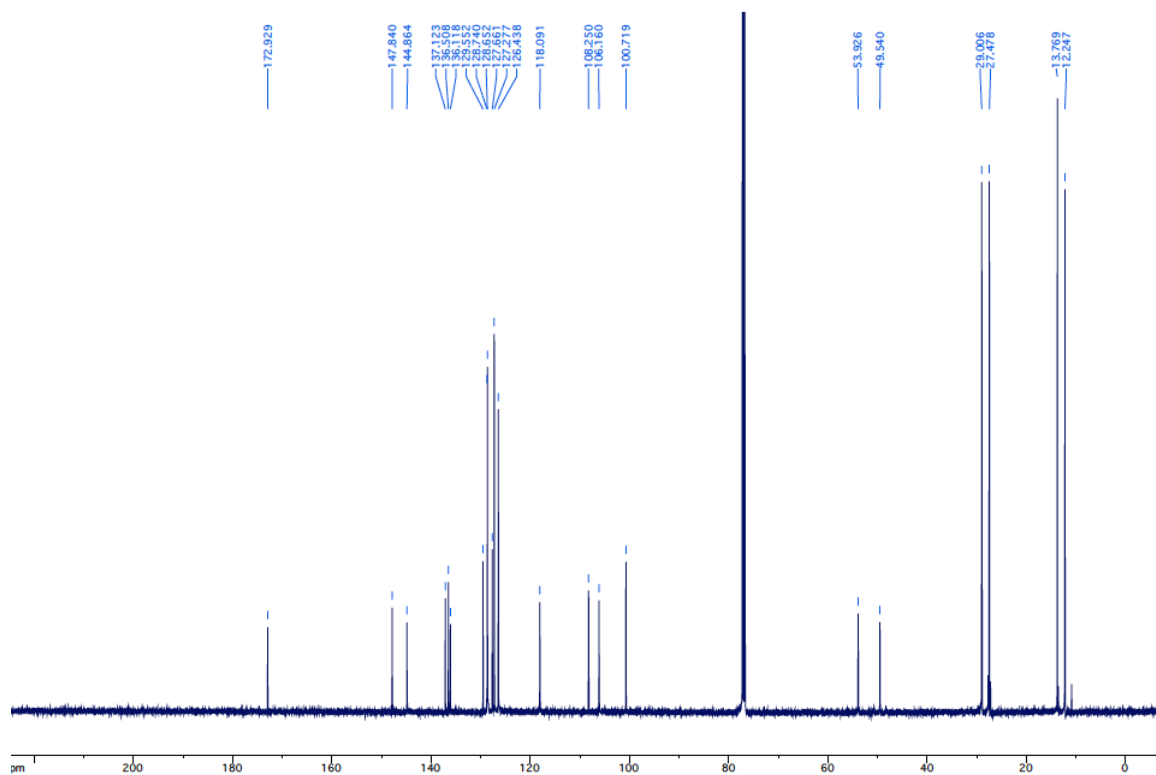

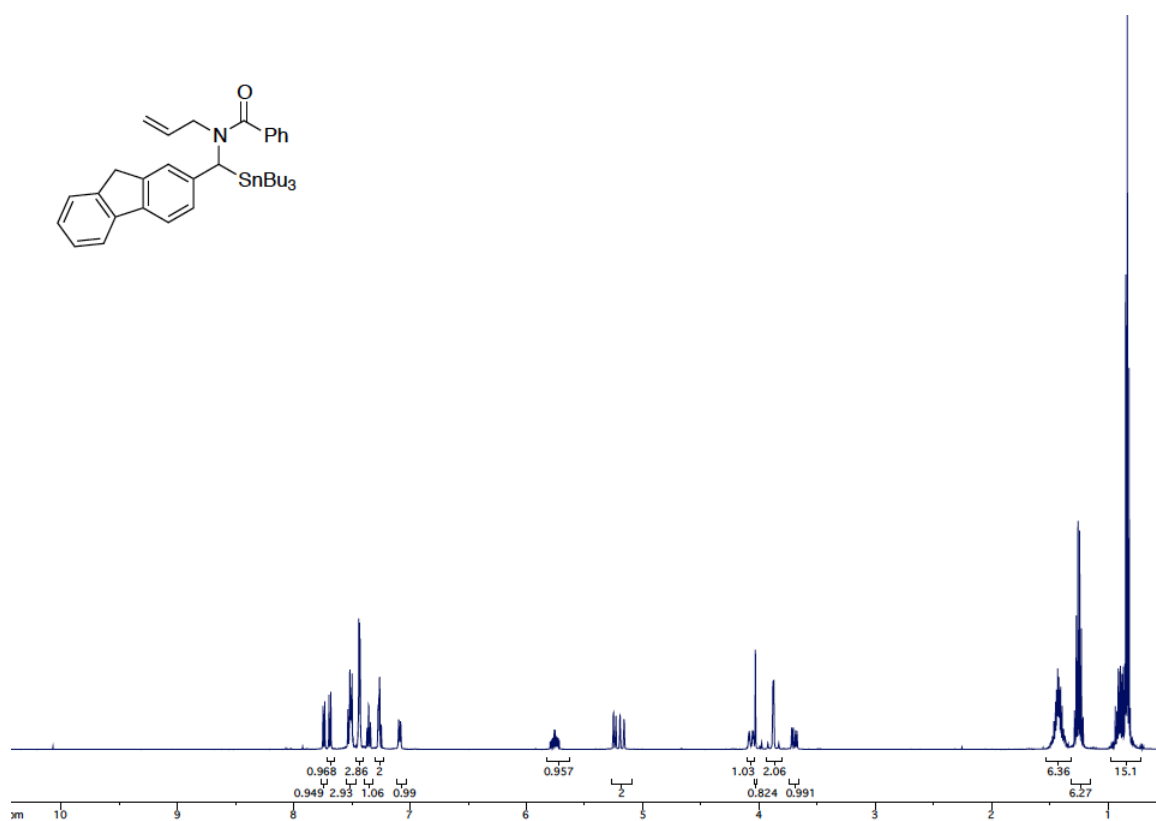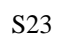

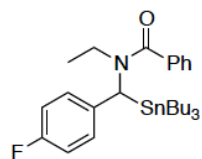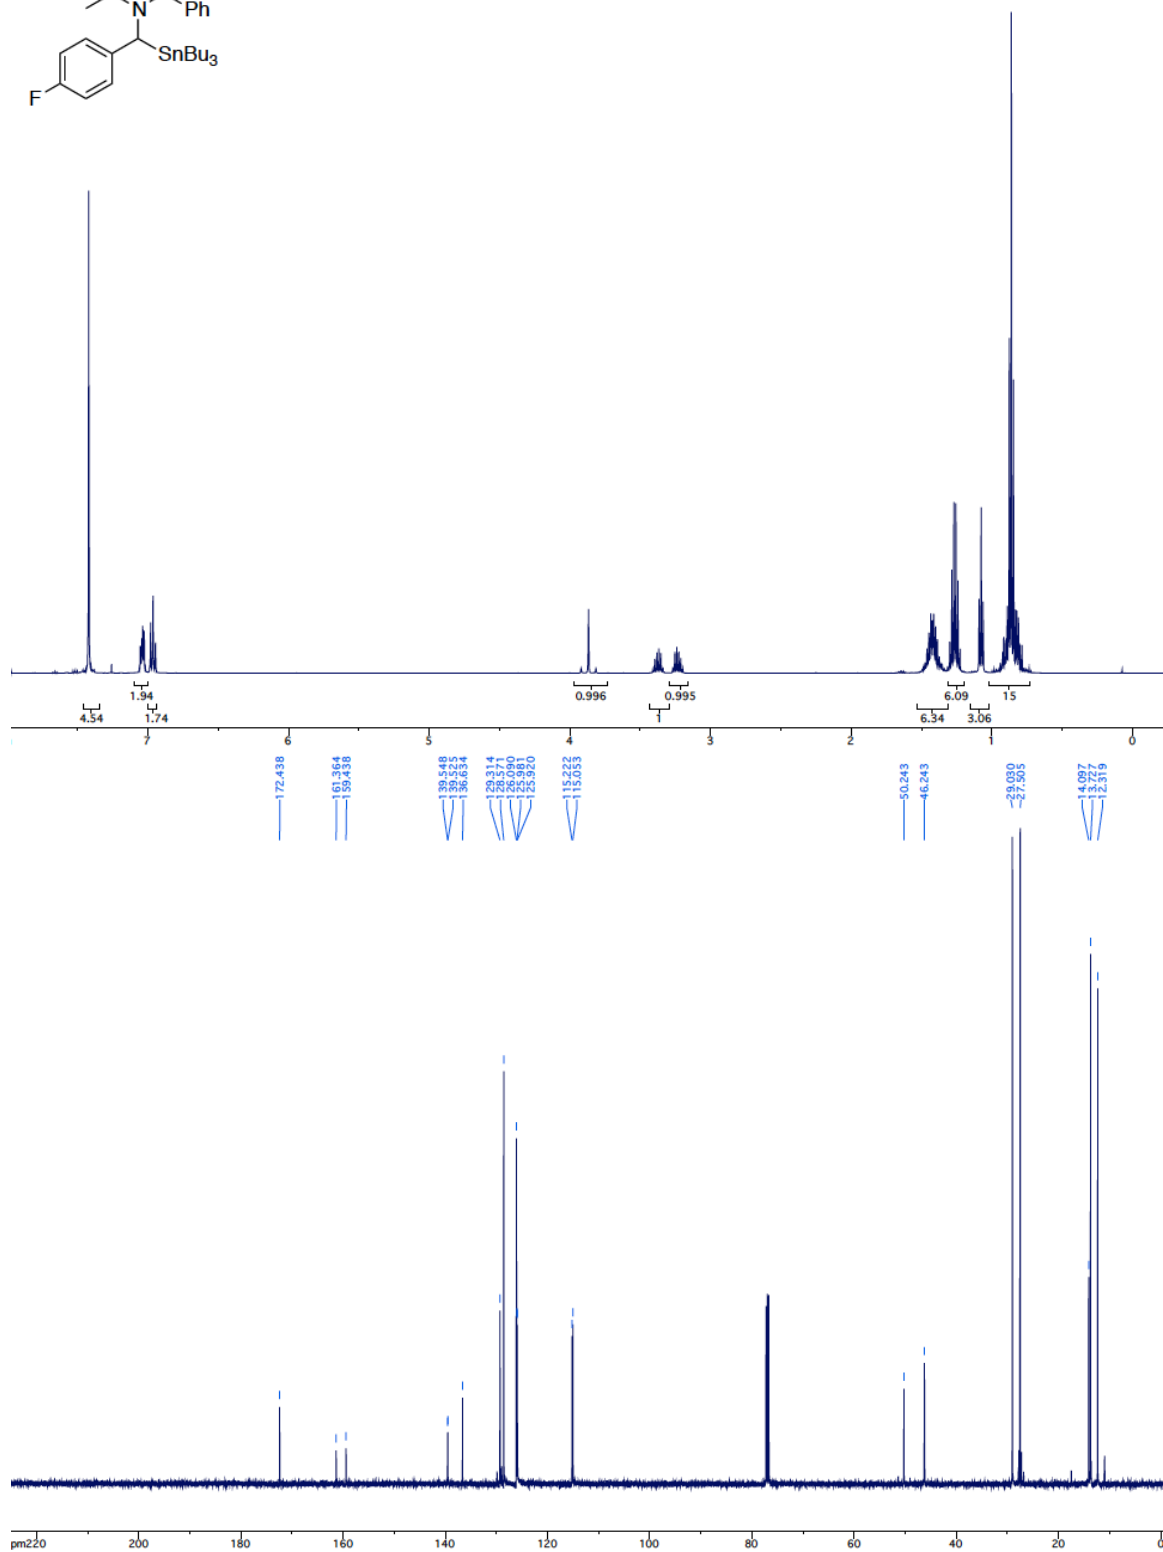



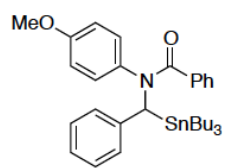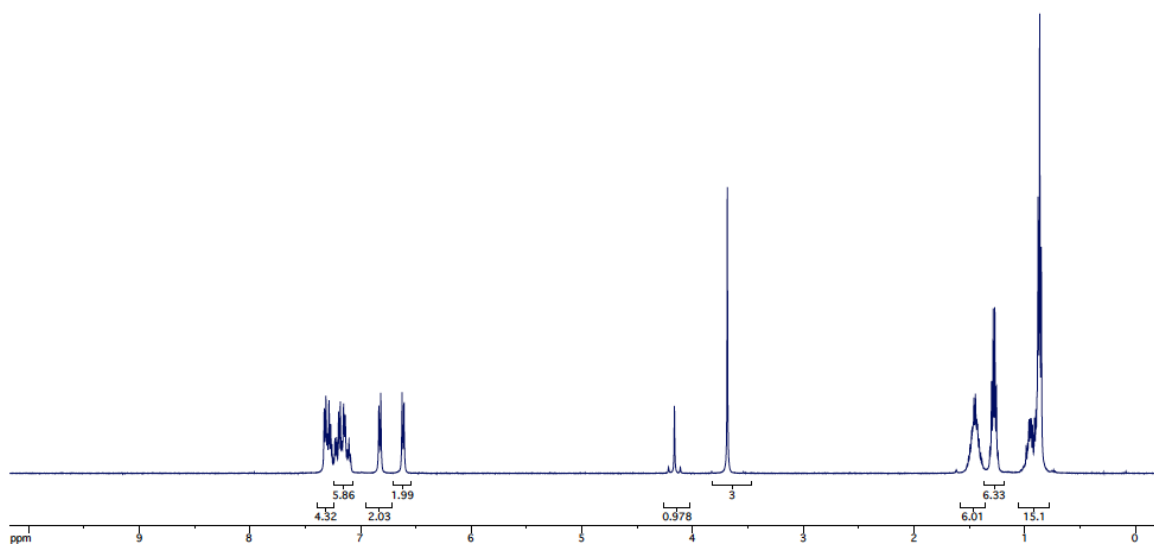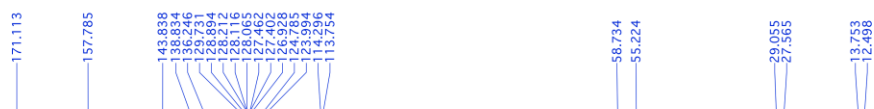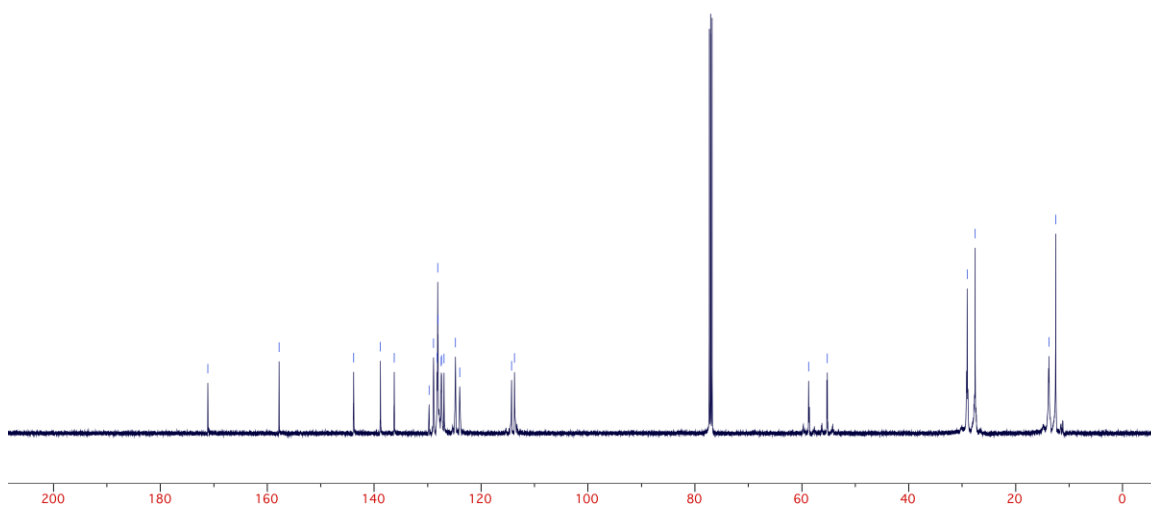

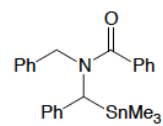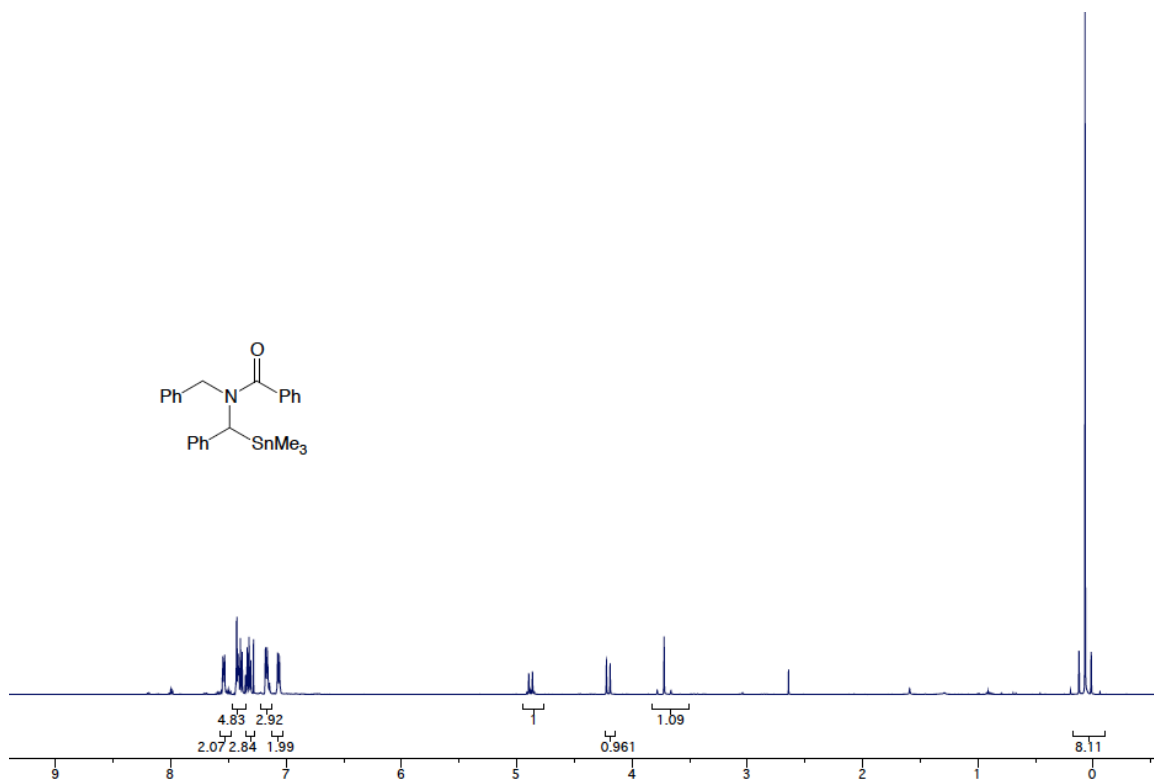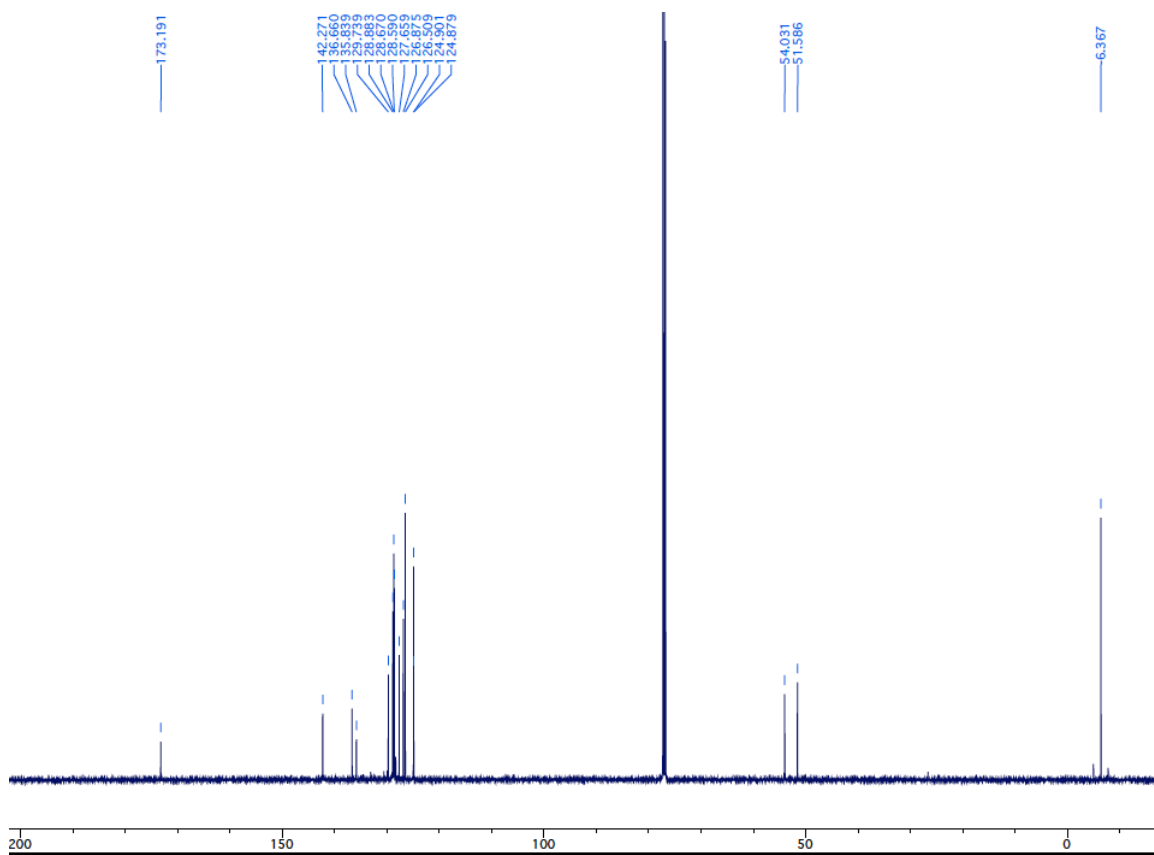

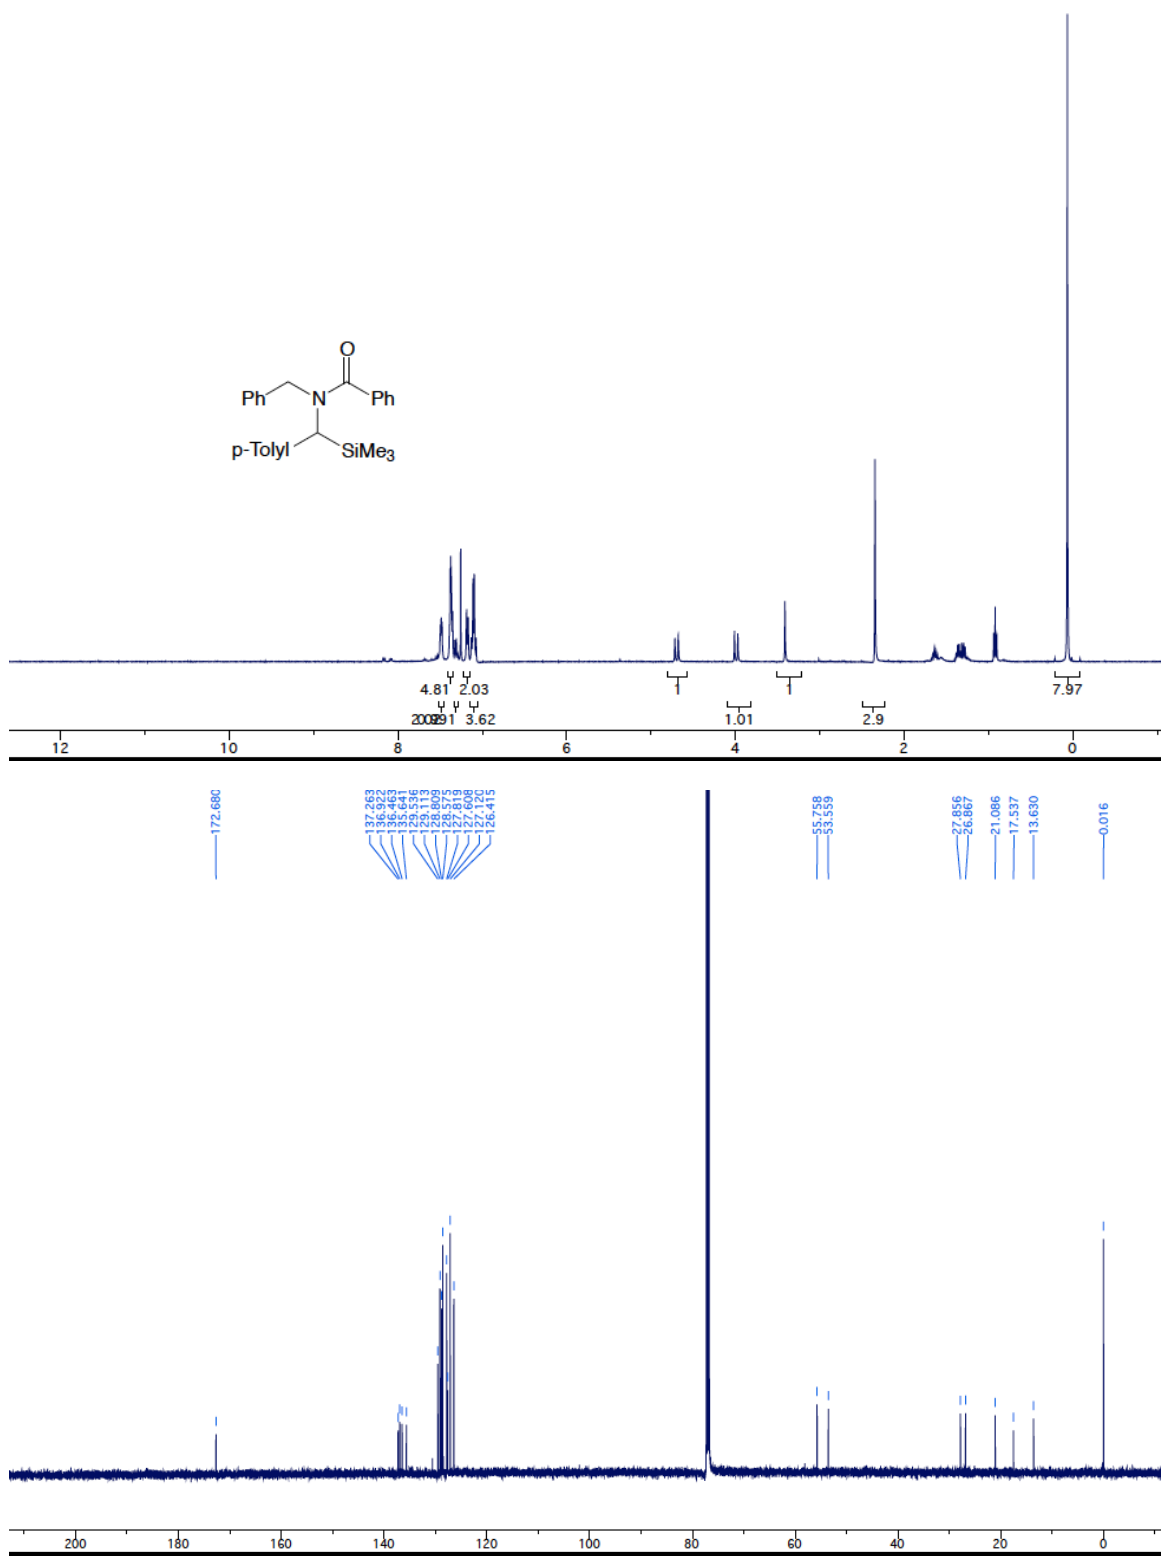

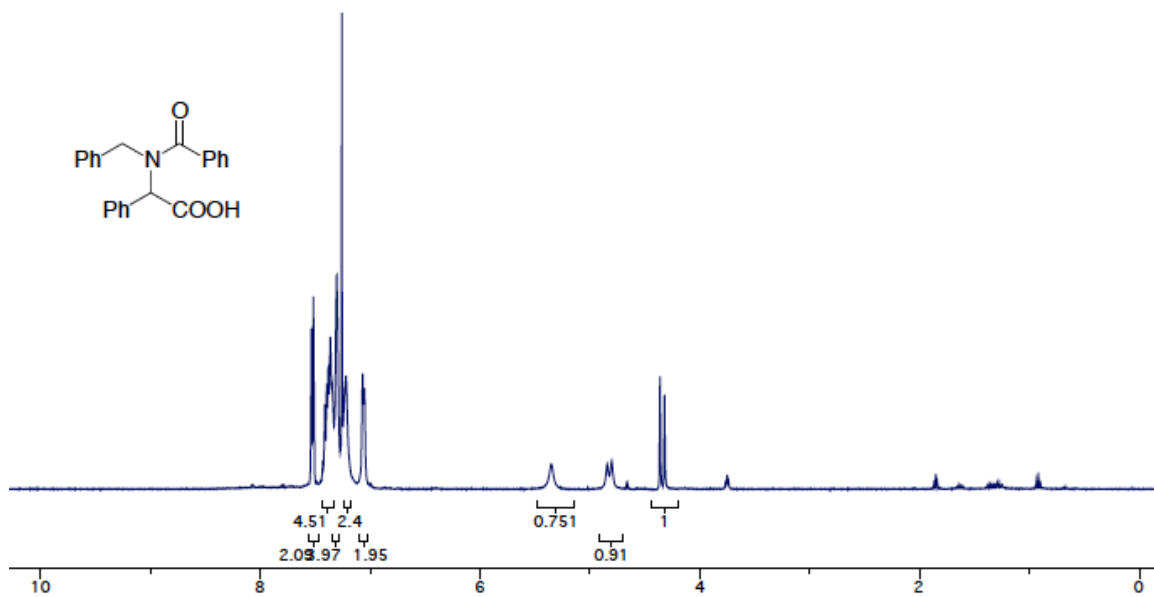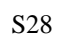

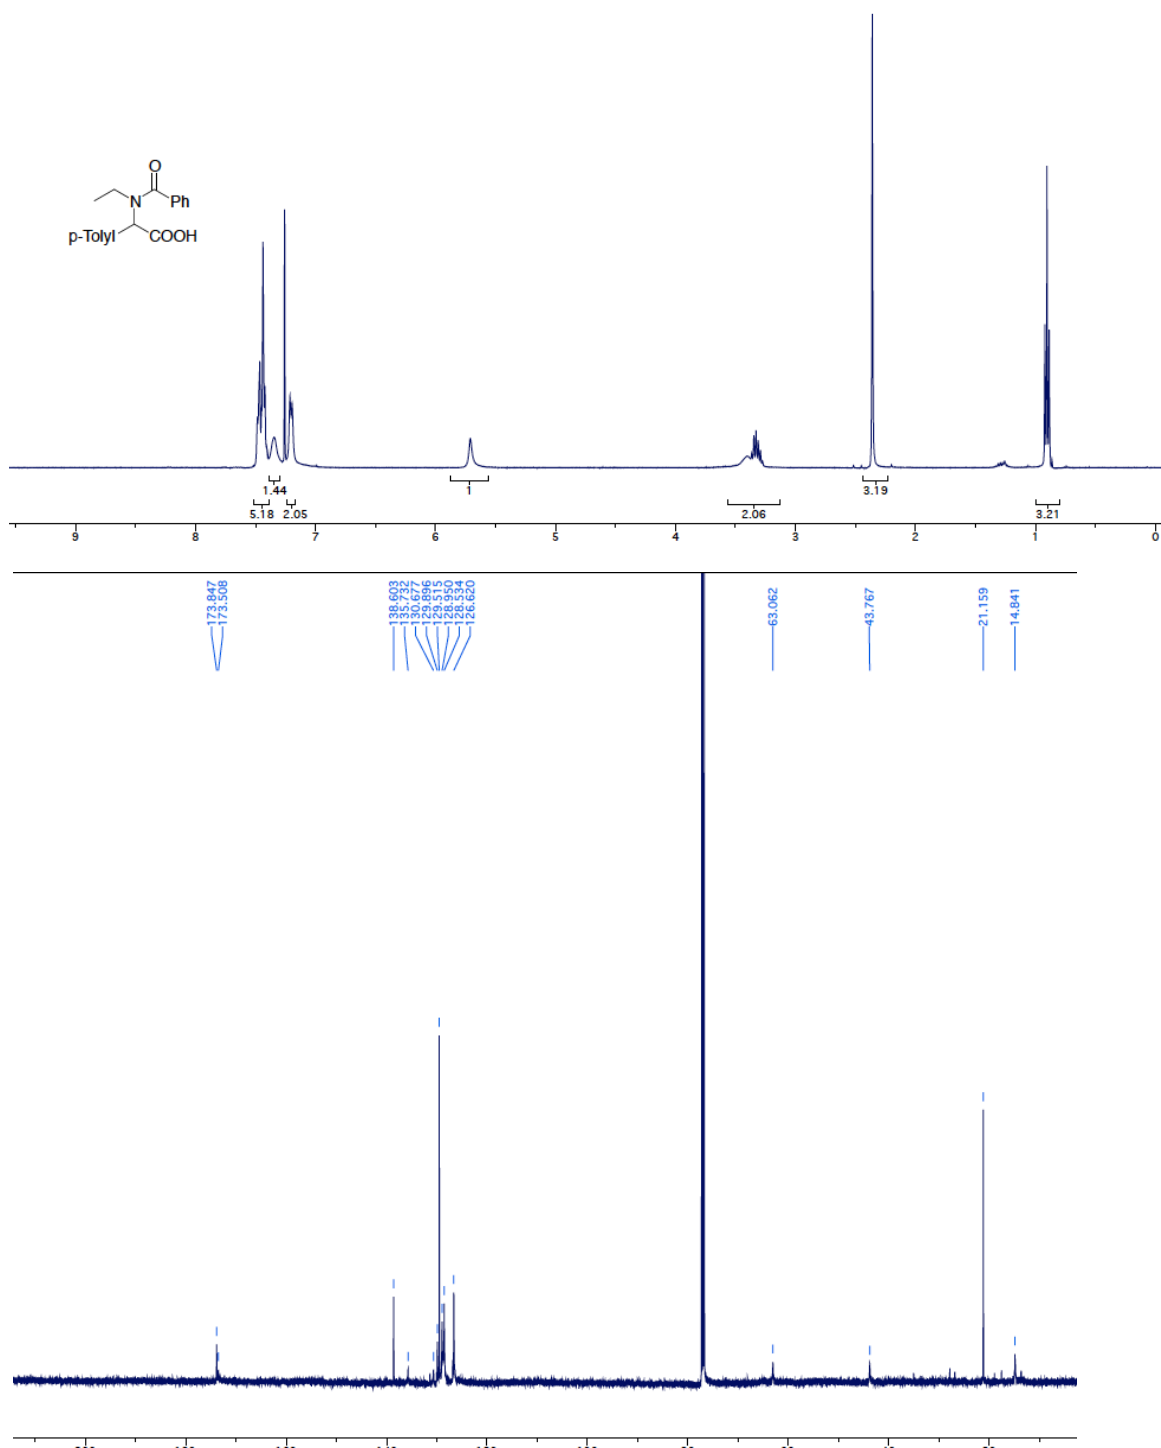

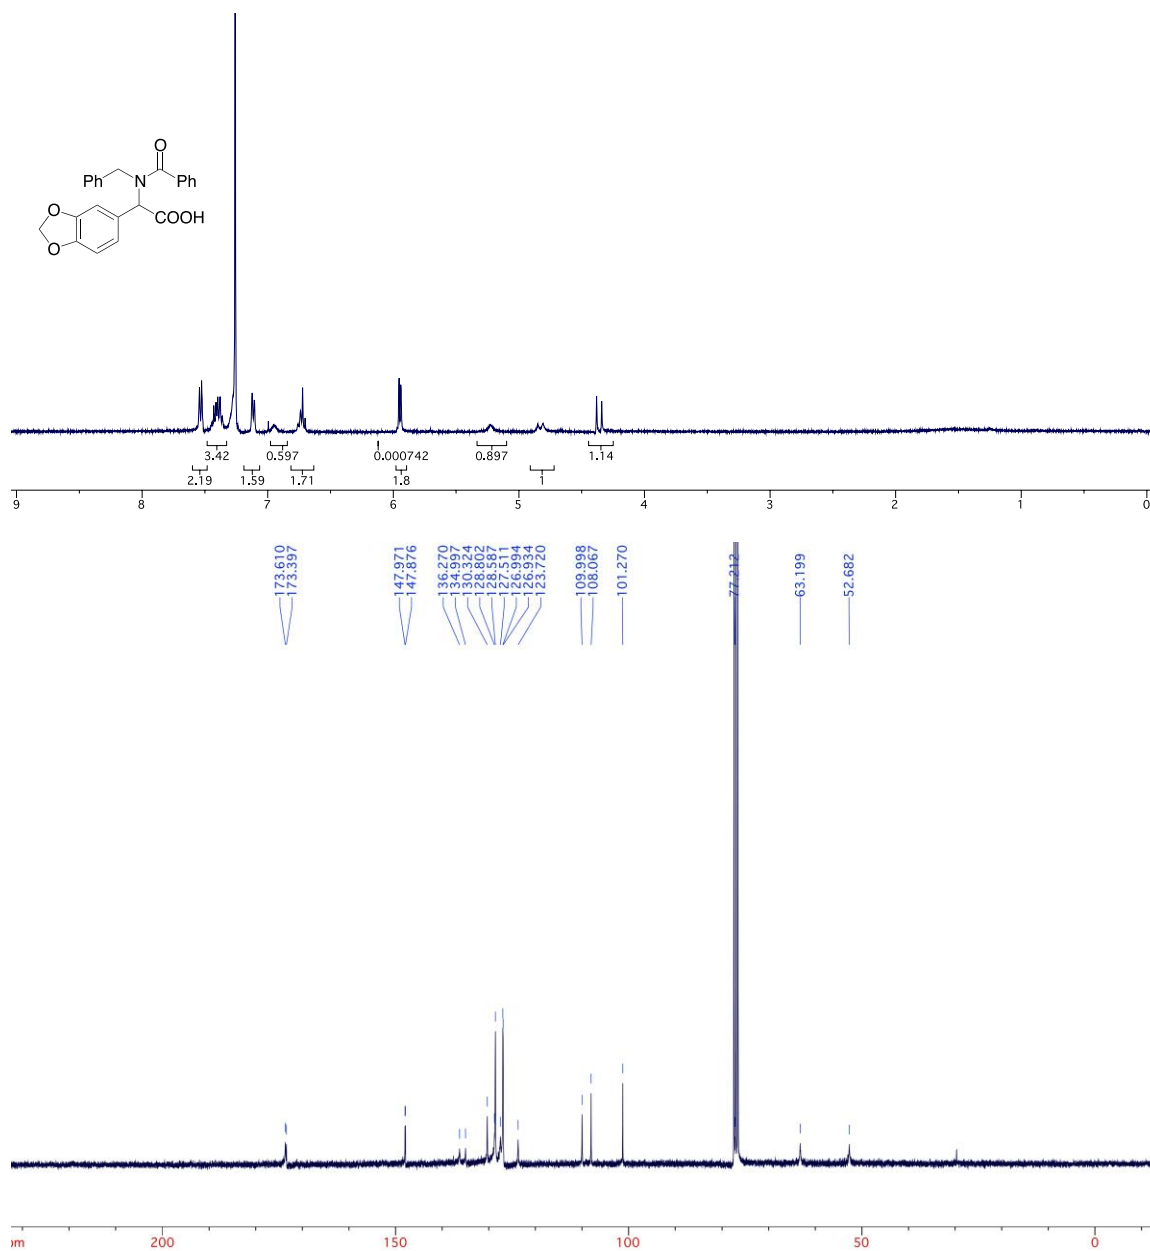

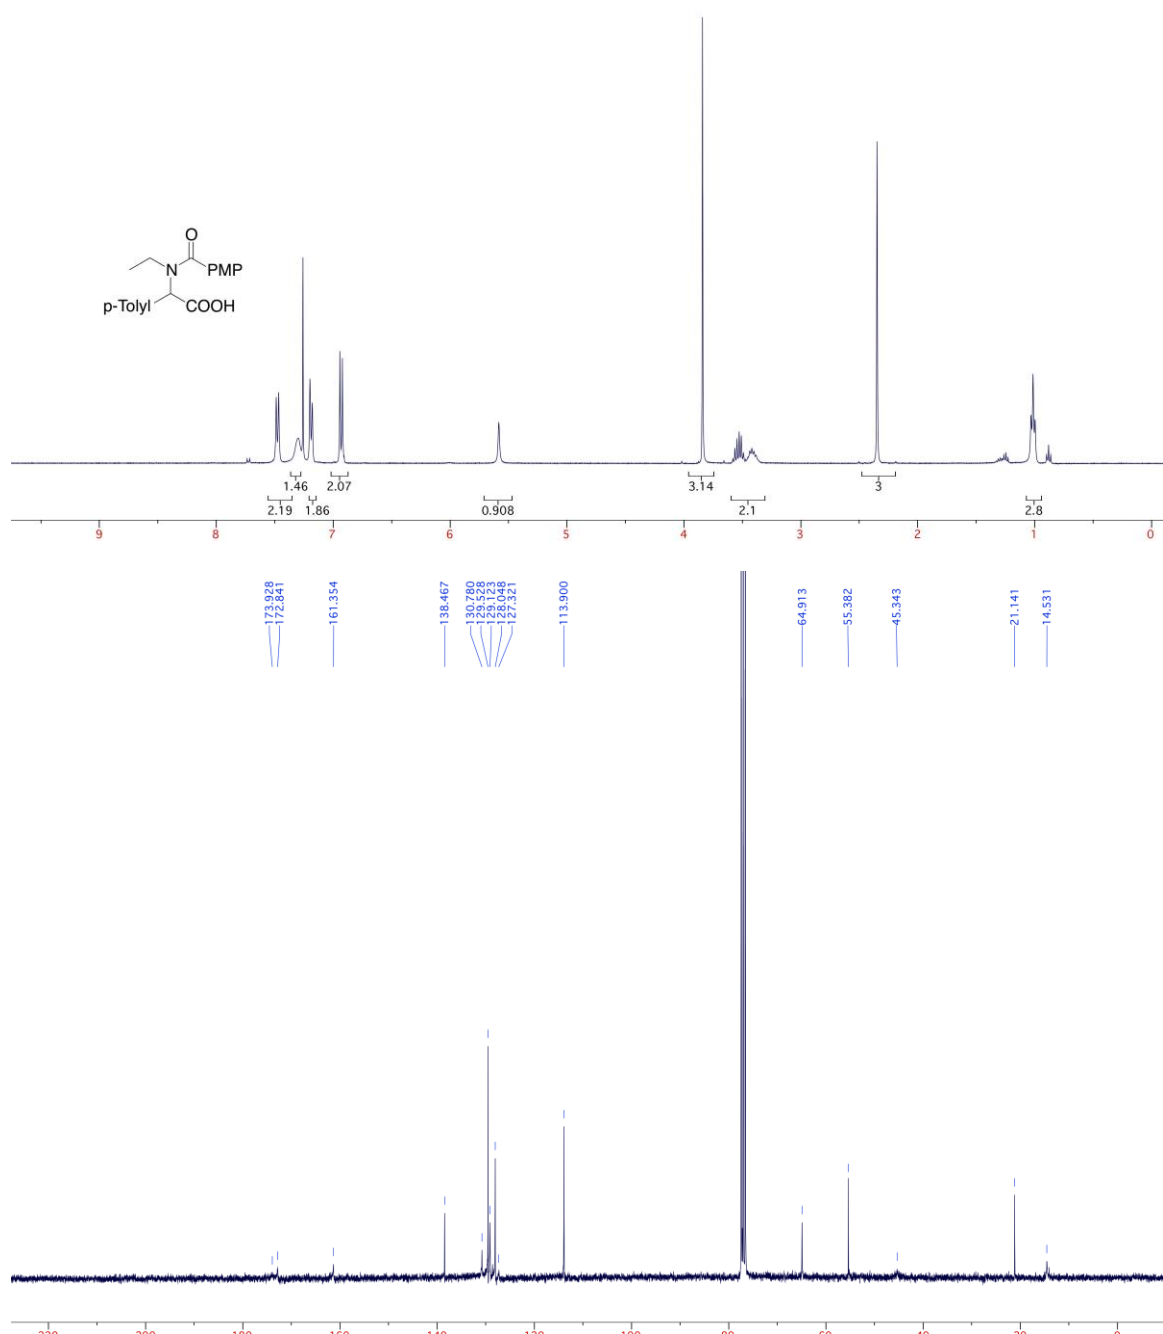

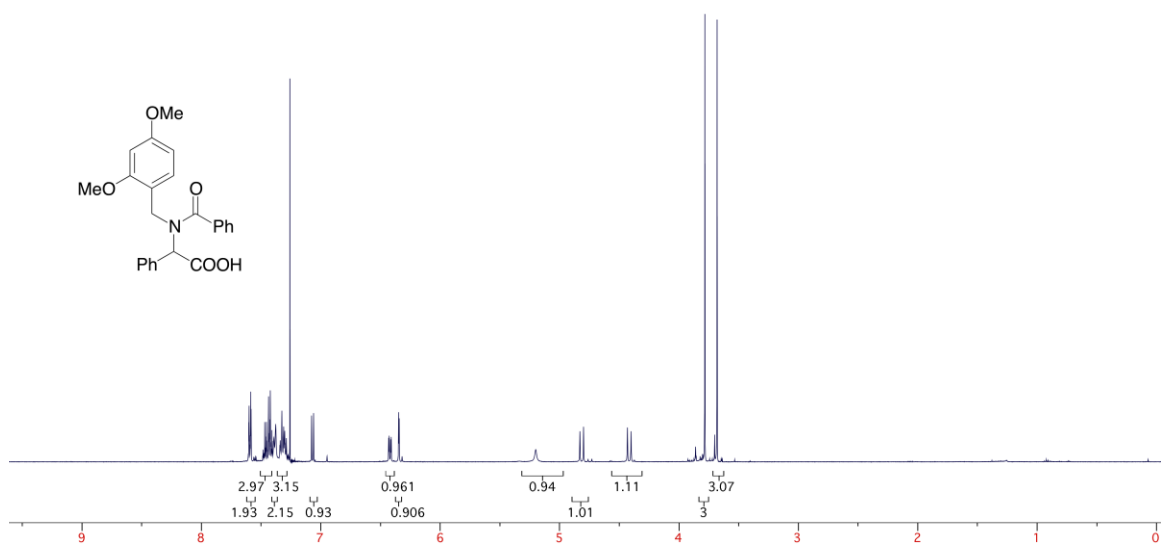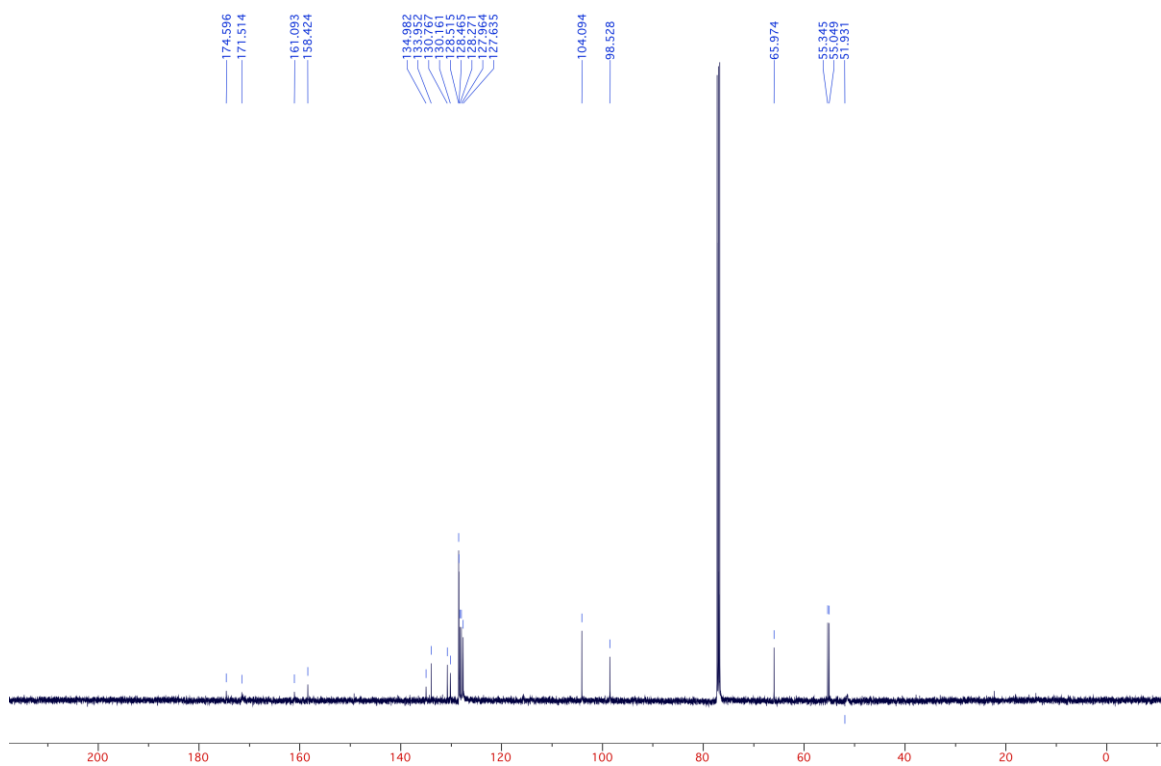

Supplement: Supplementary file 1 [file 3601023]
